# Supplementary material for: Dysregulated Bone Metabolism Is Related to High Expression of miR‐151a‐3p in Severe Adolescent Idiopathic Scoliosis
Source: Hindawi journal article supplement (doi:10.1155/2020/4243015), 2020-01-01
Supplement: f1 [file 4243015.f1.zip]

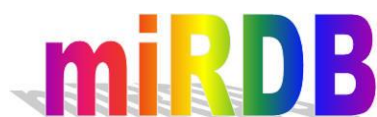

**There are 100 top predicted targets for hsa-miR-151a-3p in miRDB.**

| Target Detail           | Target Rank | Target Score | miRNA Name      |                           | Gene Description                                      |
|-------------------------|-------------|--------------|-----------------|---------------------------|-------------------------------------------------------|
| <a href="#">Details</a> | 1           | 96           | hsa-miR-151a-3p | <a href="#">FAM120AOS</a> | family with sequence similarity 120A opposite strand  |
| <a href="#">Details</a> | 2           | 95           | hsa-miR-151a-3p | <a href="#">RPS6KA5</a>   | ribosomal protein S6 kinase A5                        |
| <a href="#">Details</a> | 3           | 95           | hsa-miR-151a-3p | <a href="#">AGO2</a>      | argonaute RISC catalytic component 2                  |
| <a href="#">Details</a> | 4           | 94           | hsa-miR-151a-3p | <a href="#">COL25A1</a>   | collagen type XXV alpha 1 chain                       |
| <a href="#">Details</a> | 5           | 94           | hsa-miR-151a-3p | <a href="#">ME1</a>       | malic enzyme 1                                        |
| <a href="#">Details</a> | 6           | 93           | hsa-miR-151a-3p | <a href="#">UPP2</a>      | uridine phosphorylase 2                               |
| <a href="#">Details</a> | 7           | 91           | hsa-miR-151a-3p | <a href="#">YTHDF3</a>    | YTH N6-methyladenosine RNA binding protein 3          |
| <a href="#">Details</a> | 8           | 91           | hsa-miR-151a-3p | <a href="#">PITPNA</a>    | phosphatidylinositol transfer protein alpha           |
| <a href="#">Details</a> | 9           | 90           | hsa-miR-151a-3p | <a href="#">CASD1</a>     | CAS1 domain containing 1                              |
| <a href="#">Details</a> | 10          | 89           | hsa-miR-151a-3p | <a href="#">CLASP2</a>    | cytoplasmic linker associated protein 2               |
| <a href="#">Details</a> | 11          | 88           | hsa-miR-151a-3p | <a href="#">NAMPT</a>     | nicotinamide phosphoribosyltransferase                |
| <a href="#">Details</a> | 12          | 88           | hsa-miR-151a-3p | <a href="#">RFX3</a>      | regulatory factor X3                                  |
| <a href="#">Details</a> | 13          | 88           | hsa-miR-151a-3p | <a href="#">CLK1</a>      | CDC like kinase 1                                     |
| <a href="#">Details</a> | 14          | 86           | hsa-miR-151a-3p | <a href="#">MARC2</a>     | mitochondrial amidoxime reducing component 2          |
| <a href="#">Details</a> | 15          | 86           | hsa-miR-151a-3p | <a href="#">NAA15</a>     | N(alpha)-acetyltransferase 15, NatA auxiliary subunit |
| <a href="#">Details</a> | 16          | 85           | hsa-miR-151a-3p | <a href="#">DCTN4</a>     | dynactin subunit 4                                    |
| <a href="#">Details</a> | 17          | 85           | hsa-miR-151a-3p | <a href="#">MAP3K19</a>   | mitogen-activated protein kinase kinase kinase 19     |
| <a href="#">Details</a> | 18          | 84           | hsa-miR-151a-3p | <a href="#">FXR1</a>      | FMR1 autosomal homolog 1                              |
| <a href="#">Details</a> | 19          | 83           | hsa-miR-151a-3p | <a href="#">RILPL2</a>    | Rab interacting lysosomal protein like 2              |
| <a href="#">Details</a> | 20          | 83           | hsa-miR-151a-3p | <a href="#">MANEA</a>     | mannosidase endo-alpha                                |
| <a href="#">Details</a> | 21          | 83           | hsa-miR-151a-3p | <a href="#">AQP4</a>      | aquaporin 4                                           |
| <a href="#">Details</a> | 22          | 83           | hsa-miR-151a-3p | <a href="#">SEC63</a>     | SEC63 homolog, protein translocation regulator        |
| <a href="#">Details</a> | 23          | 83           | hsa-miR-151a-3p | <a href="#">GRM3</a>      | glutamate metabotropic receptor 3                     |

|                         |    |    |                 |                         |                                                                           |
|-------------------------|----|----|-----------------|-------------------------|---------------------------------------------------------------------------|
| <a href="#">Details</a> | 24 | 83 | hsa-miR-151a-3p | <a href="#">NIPAL2</a>  | NIPA like domain containing 2                                             |
| <a href="#">Details</a> | 25 | 83 | hsa-miR-151a-3p | <a href="#">ZNF326</a>  | zinc finger protein 326                                                   |
| <a href="#">Details</a> | 26 | 83 | hsa-miR-151a-3p | <a href="#">GFM2</a>    | G elongation factor mitochondrial 2                                       |
| <a href="#">Details</a> | 27 | 82 | hsa-miR-151a-3p | <a href="#">STXBP1</a>  | syntaxin binding protein 1                                                |
| <a href="#">Details</a> | 28 | 82 | hsa-miR-151a-3p | <a href="#">NPAS3</a>   | neuronal PAS domain protein 3                                             |
| <a href="#">Details</a> | 29 | 82 | hsa-miR-151a-3p | <a href="#">ZKSCAN4</a> | zinc finger with KRAB and SCAN domains 4                                  |
| <a href="#">Details</a> | 30 | 81 | hsa-miR-151a-3p | <a href="#">MAGEA2</a>  | MAGE family member A2                                                     |
| <a href="#">Details</a> | 31 | 81 | hsa-miR-151a-3p | <a href="#">MAGEA1</a>  | MAGE family member A1                                                     |
| <a href="#">Details</a> | 32 | 81 | hsa-miR-151a-3p | <a href="#">MAGEA2B</a> | MAGE family member A2B                                                    |
| <a href="#">Details</a> | 33 | 81 | hsa-miR-151a-3p | <a href="#">LRCH1</a>   | leucine rich repeats and calponin homology domain containing 1            |
| <a href="#">Details</a> | 34 | 81 | hsa-miR-151a-3p | <a href="#">FAM76B</a>  | family with sequence similarity 76 member B                               |
| <a href="#">Details</a> | 35 | 80 | hsa-miR-151a-3p | <a href="#">PRKACB</a>  | protein kinase cAMP-activated catalytic subunit beta                      |
| <a href="#">Details</a> | 36 | 80 | hsa-miR-151a-3p | <a href="#">TIAM1</a>   | T cell lymphoma invasion and metastasis 1                                 |
| <a href="#">Details</a> | 37 | 79 | hsa-miR-151a-3p | <a href="#">ADAM7</a>   | ADAM metalloproteinase domain 7                                           |
| <a href="#">Details</a> | 38 | 79 | hsa-miR-151a-3p | <a href="#">GLS</a>     | glutaminase                                                               |
| <a href="#">Details</a> | 39 | 78 | hsa-miR-151a-3p | <a href="#">MBNL2</a>   | muscleblind like splicing regulator 2                                     |
| <a href="#">Details</a> | 40 | 78 | hsa-miR-151a-3p | <a href="#">TPM1</a>    | tropomyosin 1                                                             |
| <a href="#">Details</a> | 41 | 78 | hsa-miR-151a-3p | <a href="#">ATP2A2</a>  | ATPase sarcoplasmic/endoplasmic reticulum Ca <sup>2+</sup> transporting 2 |
| <a href="#">Details</a> | 42 | 78 | hsa-miR-151a-3p | <a href="#">FSBP</a>    | fibrinogen silencer binding protein                                       |
| <a href="#">Details</a> | 43 | 78 | hsa-miR-151a-3p | <a href="#">SIX1</a>    | SIX homeobox 1                                                            |
| <a href="#">Details</a> | 44 | 78 | hsa-miR-151a-3p | <a href="#">TPR</a>     | translocated promoter region, nuclear basket protein                      |
| <a href="#">Details</a> | 45 | 77 | hsa-miR-151a-3p | <a href="#">MORF4L2</a> | mortality factor 4 like 2                                                 |
| <a href="#">Details</a> | 46 | 77 | hsa-miR-151a-3p | <a href="#">CP</a>      | ceruloplasmin                                                             |
| <a href="#">Details</a> | 47 | 77 | hsa-miR-151a-3p | <a href="#">GAB1</a>    | GRB2 associated binding protein 1                                         |
| <a href="#">Details</a> | 48 | 77 | hsa-miR-151a-3p | <a href="#">GREM1</a>   | gremlin 1, DAN family BMP antagonist                                      |
| <a href="#">Details</a> | 49 | 77 | hsa-miR-151a-3p | <a href="#">TAF5L</a>   | TATA-box binding protein associated factor 5 like                         |
| <a href="#">Details</a> | 50 | 76 | hsa-miR-151a-3p | <a href="#">ZFAND5</a>  | zinc finger AN1-type containing 5                                         |
| <a href="#">Details</a> | 51 | 76 | hsa-miR-151a-3p | <a href="#">MEIOC</a>   | meiosis specific with coiled-coil domain                                  |
| <a href="#">Details</a> | 52 | 76 | hsa-miR-151a-3p | <a href="#">NEUROD4</a> | neuronal differentiation 4                                                |
| <a href="#">Details</a> | 53 | 76 | hsa-miR-151a-3p | <a href="#">SHC4</a>    | SHC adaptor protein 4                                                     |

|                         |    |    |                 |                         |                                                        |
|-------------------------|----|----|-----------------|-------------------------|--------------------------------------------------------|
| <a href="#">Details</a> | 54 | 75 | hsa-miR-151a-3p | <a href="#">UGT8</a>    | UDP glycosyltransferase 8                              |
| <a href="#">Details</a> | 55 | 75 | hsa-miR-151a-3p | <a href="#">GABPA</a>   | GA binding protein transcription factor subunit alpha  |
| <a href="#">Details</a> | 56 | 75 | hsa-miR-151a-3p | <a href="#">ARMC8</a>   | armadillo repeat containing 8                          |
| <a href="#">Details</a> | 57 | 75 | hsa-miR-151a-3p | <a href="#">NAPG</a>    | NSF attachment protein gamma                           |
| <a href="#">Details</a> | 58 | 74 | hsa-miR-151a-3p | <a href="#">KPNA4</a>   | karyopherin subunit alpha 4                            |
| <a href="#">Details</a> | 59 | 74 | hsa-miR-151a-3p | <a href="#">CDK16</a>   | cyclin dependent kinase 16                             |
| <a href="#">Details</a> | 60 | 74 | hsa-miR-151a-3p | <a href="#">USP15</a>   | ubiquitin specific peptidase 15                        |
| <a href="#">Details</a> | 61 | 73 | hsa-miR-151a-3p | <a href="#">RAD54B</a>  | RAD54 homolog B                                        |
| <a href="#">Details</a> | 62 | 73 | hsa-miR-151a-3p | <a href="#">SIAH3</a>   | siah E3 ubiquitin protein ligase family member 3       |
| <a href="#">Details</a> | 63 | 73 | hsa-miR-151a-3p | <a href="#">OXR1</a>    | oxidation resistance 1                                 |
| <a href="#">Details</a> | 64 | 73 | hsa-miR-151a-3p | <a href="#">GAREM1</a>  | GRB2 associated regulator of MAPK1 subtype 1           |
| <a href="#">Details</a> | 65 | 73 | hsa-miR-151a-3p | <a href="#">ERLIN1</a>  | ER lipid raft associated 1                             |
| <a href="#">Details</a> | 66 | 73 | hsa-miR-151a-3p | <a href="#">TRA2B</a>   | transformer 2 beta homolog                             |
| <a href="#">Details</a> | 67 | 72 | hsa-miR-151a-3p | <a href="#">WAPL</a>    | WAPL cohesin release factor                            |
| <a href="#">Details</a> | 68 | 72 | hsa-miR-151a-3p | <a href="#">AKT3</a>    | AKT serine/threonine kinase 3                          |
| <a href="#">Details</a> | 69 | 72 | hsa-miR-151a-3p | <a href="#">USF3</a>    | upstream transcription factor family member 3          |
| <a href="#">Details</a> | 70 | 72 | hsa-miR-151a-3p | <a href="#">NIPBL</a>   | NIPBL, cohesin loading factor                          |
| <a href="#">Details</a> | 71 | 71 | hsa-miR-151a-3p | <a href="#">BNC2</a>    | basonuclein 2                                          |
| <a href="#">Details</a> | 72 | 71 | hsa-miR-151a-3p | <a href="#">MS4A12</a>  | membrane spanning 4-domains A12                        |
| <a href="#">Details</a> | 73 | 70 | hsa-miR-151a-3p | <a href="#">FAM237A</a> | family with sequence similarity 237 member A           |
| <a href="#">Details</a> | 74 | 70 | hsa-miR-151a-3p | <a href="#">ACTR2</a>   | ARP2 actin related protein 2 homolog                   |
| <a href="#">Details</a> | 75 | 70 | hsa-miR-151a-3p | <a href="#">STXBP4</a>  | syntaxin binding protein 4                             |
| <a href="#">Details</a> | 76 | 70 | hsa-miR-151a-3p | <a href="#">PFN2</a>    | profilin 2                                             |
| <a href="#">Details</a> | 77 | 70 | hsa-miR-151a-3p | <a href="#">LPIN2</a>   | lipin 2                                                |
| <a href="#">Details</a> | 78 | 69 | hsa-miR-151a-3p | <a href="#">TOPORS</a>  | TOP1 binding arginine/serine rich protein              |
| <a href="#">Details</a> | 79 | 69 | hsa-miR-151a-3p | <a href="#">HIPK3</a>   | homeodomain interacting protein kinase 3               |
| <a href="#">Details</a> | 80 | 69 | hsa-miR-151a-3p | <a href="#">GABRA6</a>  | gamma-aminobutyric acid type A receptor alpha6 subunit |
| <a href="#">Details</a> | 81 | 69 | hsa-miR-151a-3p | <a href="#">DLG5</a>    | discs large MAGUK scaffold protein 5                   |
| <a href="#">Details</a> | 82 | 68 | hsa-miR-151a-3p | <a href="#">PHACTR4</a> | phosphatase and actin regulator 4                      |
| <a href="#">Details</a> | 83 | 68 | hsa-miR-151a-3p | <a href="#">MAGEA4</a>  | MAGE family member A4                                  |
| <a href="#">Details</a> | 84 | 68 | hsa-miR-151a-3p | <a href="#">ZNF317</a>  | zinc finger protein 317                                |
| <a href="#">Details</a> | 85 | 68 | hsa-miR-151a-3p | <a href="#">DCLRE1C</a> | DNA cross-link repair 1C                               |
| <a href="#">Details</a> | 86 | 68 | hsa-miR-151a-3p | <a href="#">FAM104A</a> | family with sequence similarity 104 member A           |

|                         |     |    |                 |                         |                                                    |
|-------------------------|-----|----|-----------------|-------------------------|----------------------------------------------------|
| <a href="#">Details</a> | 87  | 68 | hsa-miR-151a-3p | <a href="#">CNTN2</a>   | contactin 2                                        |
| <a href="#">Details</a> | 88  | 67 | hsa-miR-151a-3p | <a href="#">HIF1A</a>   | hypoxia inducible factor 1 subunit alpha           |
| <a href="#">Details</a> | 89  | 67 | hsa-miR-151a-3p | <a href="#">ADAM10</a>  | ADAM metallopeptidase domain 10                    |
| <a href="#">Details</a> | 90  | 67 | hsa-miR-151a-3p | <a href="#">RAB22A</a>  | RAB22A, member RAS oncogene family                 |
| <a href="#">Details</a> | 91  | 67 | hsa-miR-151a-3p | <a href="#">SAP30L</a>  | SAP30 like                                         |
| <a href="#">Details</a> | 92  | 67 | hsa-miR-151a-3p | <a href="#">CHL1</a>    | cell adhesion molecule L1 like                     |
| <a href="#">Details</a> | 93  | 67 | hsa-miR-151a-3p | <a href="#">STRN3</a>   | striatin 3                                         |
| <a href="#">Details</a> | 94  | 67 | hsa-miR-151a-3p | <a href="#">CRK</a>     | CRK proto-oncogene, adaptor protein                |
| <a href="#">Details</a> | 95  | 67 | hsa-miR-151a-3p | <a href="#">PTPN12</a>  | protein tyrosine phosphatase, non-receptor type 12 |
| <a href="#">Details</a> | 96  | 66 | hsa-miR-151a-3p | <a href="#">THBS1</a>   | thrombospondin 1                                   |
| <a href="#">Details</a> | 97  | 66 | hsa-miR-151a-3p | <a href="#">ENTPD7</a>  | ectonucleoside triphosphate diphosphohydrolase 7   |
| <a href="#">Details</a> | 98  | 66 | hsa-miR-151a-3p | <a href="#">NAPEPLD</a> | N-acyl phosphatidylethanolamine phospholipase D    |
| <a href="#">Details</a> | 99  | 65 | hsa-miR-151a-3p | <a href="#">UBN2</a>    | ubiquitin 2                                        |
| <a href="#">Details</a> | 100 | 65 | hsa-miR-151a-3p | <a href="#">GAS7</a>    | growth arrest specific 7                           |
