# Supplementary material for: Dysregulated Bone Metabolism Is Related to High Expression of miR‐151a‐3p in Severe Adolescent Idiopathic Scoliosis
Source: Hindawi journal article supplement (doi:10.1155/2020/4243015), 2020-01-01
Supplement: f1 [file 4243015.f1.zip]

| Target gene | Representa | Gene name                           | 3P-seq tags | Conserved | Conserved | Conserved | Conserved | Poorly con |
|-------------|------------|-------------------------------------|-------------|-----------|-----------|-----------|-----------|------------|
| MEX3C       | ENST00000  | mex-3 RNA                           | 5           | 1         | 1         | 0         | 0         | 2          |
| SERINC4     | ENST00000  | serine inco                         | 9           | 0         | 0         | 0         | 0         | 2          |
| GREM1       | ENST00000  | gremlin 1, l                        | 752         | 0         | 0         | 0         | 0         | 2          |
| MS4A12      | ENST00000  | membrane                            | 10          | 0         | 0         | 0         | 0         | 1          |
| PANK2       | ENST00000  | pantothen                           | 1244        | 1         | 1         | 0         | 0         | 0          |
| IRF7        | ENST00000  | interferon                          | 10          | 0         | 0         | 0         | 0         | 1          |
| CLK1        | ENST00000  | CDC-like kin                        | 3430        | 1         | 1         | 0         | 0         | 0          |
| AC119673.   | ENST00000  | 598338.1                            | 5           | 0         | 0         | 0         | 0         | 1          |
| CYP7B1      | ENST00000  | cytochrom                           | 53          | 1         | 1         | 0         | 0         | 3          |
| FBXL3       | ENST00000  | F-box and l                         | 842         | 0         | 0         | 0         | 0         | 2          |
| STXBP4      | ENST00000  | syntaxin bi                         | 62          | 0         | 0         | 0         | 0         | 3          |
| ME1         | ENST00000  | malic enzyr                         | 586         | 0         | 0         | 0         | 0         | 1          |
| KRTAP2-2    | ENST00000  | keratin asso                        | 5           | 0         | 0         | 0         | 0         | 1          |
| ZNF345      | ENST00000  | zinc finger                         | 24          | 0         | 0         | 0         | 0         | 2          |
| TRA2B       | ENST00000  | transforme                          | 1868        | 1         | 1         | 0         | 0         | 0          |
| CEP95       | ENST00000  | centrosom                           | 46          | 0         | 0         | 0         | 0         | 1          |
| ZMAT1       | ENST00000  | zinc finger,                        | 5           | 1         | 0         | 1         | 0         | 1          |
| NUDT4       | ENST00000  | nudix (nucl                         | 41          | 0         | 0         | 0         | 0         | 2          |
| SOCS5       | ENST00000  | suppressor                          | 72          | 1         | 1         | 0         | 0         | 1          |
| UCHL1       | ENST00000  | ubiquitin c                         | 21879       | 0         | 0         | 0         | 0         | 1          |
| UPP2        | ENST00000  | uridine phc                         | 5           | 1         | 1         | 0         | 0         | 0          |
| ATF1        | ENST00000  | activating t                        | 1599        | 0         | 0         | 0         | 0         | 1          |
| GABRA6      | ENST00000  | gamma-am                            | 5           | 0         | 0         | 0         | 0         | 1          |
| RAD54B      | ENST00000  | RAD54 hon                           | 36          | 0         | 0         | 0         | 0         | 2          |
| NKAIN3      | ENST00000  | Na <sup>+</sup> /K <sup>+</sup> tra | 5           | 0         | 0         | 0         | 0         | 1          |
| CEACAM5     | ENST00000  | carcinoemb                          | 5           | 0         | 0         | 0         | 0         | 1          |
| SLC26A2     | ENST00000  | solute carri                        | 748         | 0         | 0         | 0         | 0         | 4          |
| PCP4L1      | ENST00000  | Purkinje ce                         | 23          | 0         | 0         | 0         | 0         | 3          |
| CASP5       | ENST00000  | caspase 5,                          | 5           | 0         | 0         | 0         | 0         | 1          |
| NEUROD4     | ENST00000  | neuronal d                          | 5           | 0         | 0         | 0         | 0         | 2          |
| PAPOLG      | ENST00000  | poly(A) pol                         | 49          | 1         | 0         | 0         | 1         | 2          |
| RPE         | ENST00000  | ribulose-5-                         | 333         | 0         | 0         | 0         | 0         | 2          |
| HTR1F       | ENST00000  | 5-hydroxyt                          | 5           | 0         | 0         | 0         | 0         | 1          |
| SIX1        | ENST00000  | SIX homeol                          | 1264        | 1         | 1         | 0         | 0         | 0          |
| PTPN12      | ENST00000  | protein tyr                         | 167         | 0         | 0         | 0         | 0         | 1          |
| FAM120AC    | ENST00000  | family with                         | 258         | 0         | 0         | 0         | 0         | 1          |
| AP005482.   | ENST00000  | Uncharacte                          | 44          | 0         | 0         | 0         | 0         | 2          |
| RAB22A      | ENST00000  | RAB22A, m                           | 484         | 0         | 0         | 0         | 0         | 3          |
| C9orf38     | ENST00000  | chromosom                           | 5           | 0         | 0         | 0         | 0         | 1          |
| C1orf95     | ENST00000  | chromosom                           | 28          | 0         | 0         | 0         | 0         | 1          |
| NIPAL2      | ENST00000  | NIPA-like d                         | 7           | 1         | 1         | 0         | 0         | 1          |
| PFN2        | ENST00000  | profilin 2                          | 2184        | 1         | 1         | 0         | 0         | 0          |
| KCNH8       | ENST00000  | potassium                           | 5           | 0         | 0         | 0         | 0         | 2          |
| COL25A1     | ENST00000  | collagen, ty                        | 270         | 0         | 0         | 0         | 0         | 2          |
| AQP4        | ENST00000  | aquaporin                           | 10          | 0         | 0         | 0         | 0         | 1          |
| FAM169A     | ENST00000  | family with                         | 90          | 0         | 0         | 0         | 0         | 2          |

|            |                        |      |   |   |   |   |   |
|------------|------------------------|------|---|---|---|---|---|
| ZIK1       | ENST00000 zinc finger  | 64   | 0 | 0 | 0 | 0 | 1 |
| LIG4       | ENST00000 ligase IV, D | 113  | 0 | 0 | 0 | 0 | 1 |
| ZNF24      | ENST00000 zinc finger  | 1796 | 0 | 0 | 0 | 0 | 2 |
| WFDC11     | ENST00000 WAP four-c   | 5    | 0 | 0 | 0 | 0 | 1 |
| AVP11      | ENST00000 arginine va  | 4404 | 0 | 0 | 0 | 0 | 1 |
| PGAM1      | ENST00000 phosphogly   | 927  | 0 | 0 | 0 | 0 | 1 |
| GFM2       | ENST00000 G elongatic  | 19   | 0 | 0 | 0 | 0 | 1 |
| RP11-382J1 | ENST00000 Uncharacte   | 5    | 0 | 0 | 0 | 0 | 1 |
| BTLA       | ENST00000 B and T lym  | 5    | 0 | 0 | 0 | 0 | 1 |
| RFESD      | ENST00000 Rieske (Fe-  | 15   | 1 | 0 | 1 | 0 | 2 |
| HMG2       | ENST00000 high mobili  | 184  | 0 | 0 | 0 | 0 | 1 |
| KDEL2      | ENST00000 KDEL (Lys-/  | 667  | 0 | 0 | 0 | 0 | 2 |
| LRRC37A3   | ENST00000 leucine rich | 5    | 0 | 0 | 0 | 0 | 1 |
| MAP3K19    | ENST00000 mitogen-ac   | 5    | 0 | 0 | 0 | 0 | 1 |
| KLHL4      | ENST00000 kelch-like f | 58   | 0 | 0 | 0 | 0 | 2 |
| DCTN4      | ENST00000 dynactin 4   | 153  | 0 | 0 | 0 | 0 | 1 |
| SMCO1      | ENST00000 single-pass  | 5    | 0 | 0 | 0 | 0 | 1 |
| LUC7L      | ENST00000 LUC7-like (C | 898  | 0 | 0 | 0 | 0 | 1 |
| YTHDF3     | ENST00000 YTH domain   | 444  | 1 | 1 | 0 | 0 | 1 |
| AFF4       | ENST00000 AF4/FMR2     | 2755 | 0 | 0 | 0 | 0 | 3 |
| KIAA1217   | ENST00000 KIAA1217     | 320  | 0 | 0 | 0 | 0 | 3 |
| WNT6       | ENST00000 wingless-ty  | 7    | 0 | 0 | 0 | 0 | 1 |
| PPP2CB     | ENST00000 protein pho  | 11   | 0 | 0 | 0 | 0 | 1 |
| HSDL1      | ENST00000 hydroxyste   | 699  | 0 | 0 | 0 | 0 | 1 |
| HES7       | ENST00000 hairy and e  | 416  | 0 | 0 | 0 | 0 | 1 |
| CCDC67     | ENST00000 coiled-coil  | 5    | 1 | 1 | 0 | 0 | 0 |
| RYBP       | ENST00000 RING1 and    | 342  | 1 | 0 | 1 | 0 | 2 |
| CAPZA2     | ENST00000 capping pro  | 2065 | 0 | 0 | 0 | 0 | 1 |
| SLA        | ENST00000 Src-like-ada | 5    | 0 | 0 | 0 | 0 | 1 |
| PGAM4      | ENST00000 phosphogly   | 5    | 0 | 0 | 0 | 0 | 1 |
| ADAM7      | ENST00000 ADAM met     | 5    | 0 | 0 | 0 | 0 | 1 |
| RERG       | ENST00000 RAS-like, es | 162  | 0 | 0 | 0 | 0 | 2 |
| KRT38      | ENST00000 keratin 38   | 5    | 0 | 0 | 0 | 0 | 1 |
| CRK        | ENST00000 v-crk avian  | 1841 | 1 | 0 | 1 | 0 | 1 |
| ADIPOQ     | ENST00000 adiponectin  | 5    | 0 | 0 | 0 | 0 | 1 |
| ZNF772     | ENST00000 zinc finger  | 22   | 0 | 0 | 0 | 0 | 1 |
| URM1       | ENST00000 ubiquitin re | 345  | 0 | 0 | 0 | 0 | 2 |
| KRTAP20-4  | ENST00000 keratin asso | 5    | 0 | 0 | 0 | 0 | 1 |
| MTPN       | ENST00000 myotrophin   | 1296 | 0 | 0 | 0 | 0 | 2 |
| GLIPR1L2   | ENST00000 GLI pathoge  | 5    | 0 | 0 | 0 | 0 | 1 |
| AL354808.1 | ENST00000601204.1      | 5    | 0 | 0 | 0 | 0 | 1 |
| MLANA      | ENST00000 melan-A      | 5    | 0 | 0 | 0 | 0 | 1 |
| A2ML1      | ENST00000 alpha-2-ma   | 5    | 0 | 0 | 0 | 0 | 1 |
| HPDL       | ENST00000 4-hydroxyp   | 418  | 0 | 0 | 0 | 0 | 1 |
| APOL6      | ENST00000 apolipopro   | 5    | 0 | 0 | 0 | 0 | 2 |
| IKZF3      | ENST00000 IKAROS fan   | 7    | 0 | 0 | 0 | 0 | 2 |
| IL26       | ENST00000 interleukin  | 5    | 0 | 0 | 0 | 0 | 1 |

|          |                         |     |   |   |   |   |   |
|----------|-------------------------|-----|---|---|---|---|---|
| ANKRD44  | ENST00000C ankyrin rep  | 187 | 0 | 0 | 0 | 0 | 1 |
| ZNF799   | ENST00000C zinc finger  | 17  | 0 | 0 | 0 | 0 | 3 |
| NAMPT    | ENST00000C nicotinamir  | 375 | 0 | 0 | 0 | 0 | 1 |
| SULT4A1  | ENST00000C sulfotransfe | 25  | 0 | 0 | 0 | 0 | 2 |
| RBM7     | ENST00000C RNA bindin   | 46  | 0 | 0 | 0 | 0 | 1 |
| PANX3    | ENST00000C pannexin 3   | 5   | 0 | 0 | 0 | 0 | 1 |
| C6orf106 | ENST00000C chromosom    | 80  | 1 | 1 | 0 | 0 | 0 |

| Poorly con: | Poorly con: | Poorly con: | 6mer sites | Representa | Cumulative | Total | conte | Aggregate | Previous Ta |
|-------------|-------------|-------------|------------|------------|------------|-------|-------|-----------|-------------|
| 0           | 1           | 1           | 1          | hsa-miR-15 | -0.73      | -0.73 | N/A   |           |             |
| 2           | 0           | 0           | 0          | hsa-miR-15 | -0.72      | -0.72 | N/A   |           |             |
| 1           | 0           | 1           | 0          | hsa-miR-15 | -0.71      | -0.72 | N/A   |           |             |
| 1           | 0           | 0           | 0          | hsa-miR-15 | -0.71      | -0.71 | N/A   |           |             |
| 0           | 0           | 0           | 0          | hsa-miR-15 | -0.7       | -0.7  | N/A   |           |             |
| 1           | 0           | 0           | 0          | hsa-miR-15 | -0.67      | -0.67 | N/A   |           |             |
| 0           | 0           | 0           | 0          | hsa-miR-15 | -0.64      | -0.64 | N/A   |           | 2007        |
| 1           | 0           | 0           | 0          | hsa-miR-15 | -0.64      | -0.64 | N/A   |           |             |
| 0           | 1           | 2           | 0          | hsa-miR-15 | -0.64      | -0.68 | N/A   |           |             |
| 1           | 1           | 0           | 1          | hsa-miR-15 | -0.62      | -0.7  | N/A   |           |             |
| 1           | 0           | 2           | 1          | hsa-miR-15 | -0.62      | -0.72 | N/A   |           |             |
| 1           | 0           | 0           | 0          | hsa-miR-15 | -0.62      | -0.62 | N/A   |           |             |
| 1           | 0           | 0           | 0          | hsa-miR-15 | -0.61      | -0.61 | N/A   |           |             |
| 1           | 0           | 1           | 0          | hsa-miR-15 | -0.61      | -0.61 | N/A   |           |             |
| 0           | 0           | 0           | 0          | hsa-miR-15 | -0.59      | -0.59 | N/A   |           |             |
| 1           | 0           | 0           | 0          | hsa-miR-15 | -0.59      | -0.59 | N/A   |           |             |
| 0           | 1           | 0           | 2          | hsa-miR-15 | -0.57      | -0.57 | N/A   |           |             |
| 1           | 1           | 0           | 1          | hsa-miR-15 | -0.57      | -0.57 | N/A   |           |             |
| 1           | 0           | 0           | 1          | hsa-miR-15 | -0.57      | -0.57 | N/A   |           |             |
| 1           | 0           | 0           | 0          | hsa-miR-15 | -0.56      | -0.56 | N/A   |           |             |
| 0           | 0           | 0           | 0          | hsa-miR-15 | -0.56      | -0.56 | N/A   |           | 2007        |
| 1           | 0           | 0           | 2          | hsa-miR-15 | -0.55      | -0.64 | N/A   |           |             |
| 1           | 0           | 0           | 0          | hsa-miR-15 | -0.54      | -0.54 | N/A   |           |             |
| 1           | 0           | 1           | 0          | hsa-miR-15 | -0.54      | -0.59 | N/A   |           |             |
| 1           | 0           | 0           | 0          | hsa-miR-15 | -0.53      | -0.53 | N/A   |           |             |
| 1           | 0           | 0           | 0          | hsa-miR-15 | -0.53      | -0.53 | N/A   |           |             |
| 0           | 1           | 3           | 2          | hsa-miR-15 | -0.53      | -0.53 | N/A   |           |             |
| 0           | 0           | 3           | 0          | hsa-miR-15 | -0.53      | -0.53 | N/A   |           |             |
| 1           | 0           | 0           | 0          | hsa-miR-15 | -0.53      | -0.53 | N/A   |           |             |
| 1           | 0           | 1           | 0          | hsa-miR-15 | -0.52      | -0.52 | N/A   |           |             |
| 1           | 0           | 1           | 1          | hsa-miR-15 | -0.51      | -0.59 | N/A   |           |             |
| 1           | 0           | 1           | 0          | hsa-miR-15 | -0.5       | -0.55 | N/A   |           |             |
| 1           | 0           | 0           | 1          | hsa-miR-15 | -0.5       | -0.5  | N/A   |           |             |
| 0           | 0           | 0           | 0          | hsa-miR-15 | -0.5       | -0.5  | N/A   |           |             |
| 1           | 0           | 0           | 0          | hsa-miR-15 | -0.5       | -0.5  | N/A   |           |             |
| 1           | 0           | 0           | 1          | hsa-miR-15 | -0.49      | -0.49 | N/A   |           |             |
| 0           | 2           | 0           | 0          | hsa-miR-15 | -0.49      | -0.59 | N/A   |           |             |
| 1           | 0           | 2           | 1          | hsa-miR-15 | -0.48      | -0.86 | N/A   |           |             |
| 1           | 0           | 0           | 0          | hsa-miR-15 | -0.48      | -0.48 | N/A   |           |             |
| 1           | 0           | 0           | 0          | hsa-miR-15 | -0.48      | -0.48 | N/A   |           |             |
| 0           | 0           | 1           | 1          | hsa-miR-15 | -0.48      | -0.48 | N/A   |           |             |
| 0           | 0           | 0           | 0          | hsa-miR-15 | -0.48      | -0.5  | N/A   |           | 2007        |
| 1           | 1           | 0           | 0          | hsa-miR-15 | -0.47      | -0.47 | N/A   |           |             |
| 2           | 0           | 0           | 0          | hsa-miR-15 | -0.47      | -0.57 | N/A   |           |             |
| 1           | 0           | 0           | 1          | hsa-miR-15 | -0.47      | -0.47 | N/A   |           |             |
| 0           | 2           | 0           | 2          | hsa-miR-15 | -0.47      | -0.51 | N/A   |           |             |

|   |   |   |              |       |           |      |
|---|---|---|--------------|-------|-----------|------|
| 1 | 0 | 0 | 1 hsa-miR-15 | -0.47 | -0.47 N/A |      |
| 1 | 0 | 0 | 0 hsa-miR-15 | -0.47 | -0.47 N/A |      |
| 1 | 0 | 1 | 0 hsa-miR-15 | -0.47 | -0.61 N/A |      |
| 0 | 1 | 0 | 0 hsa-miR-15 | -0.47 | -0.47 N/A |      |
| 1 | 0 | 0 | 0 hsa-miR-15 | -0.47 | -0.47 N/A |      |
| 1 | 0 | 0 | 0 hsa-miR-15 | -0.47 | -0.47 N/A |      |
| 1 | 0 | 0 | 0 hsa-miR-15 | -0.47 | -0.66 N/A |      |
| 1 | 0 | 0 | 0 hsa-miR-15 | -0.47 | -0.47 N/A |      |
| 1 | 0 | 0 | 0 hsa-miR-15 | -0.47 | -0.47 N/A |      |
| 0 | 1 | 1 | 0 hsa-miR-15 | -0.46 | -0.82 N/A |      |
| 1 | 0 | 0 | 0 hsa-miR-15 | -0.46 | -0.49 N/A |      |
| 1 | 0 | 1 | 0 hsa-miR-15 | -0.46 | -0.48 N/A |      |
| 1 | 0 | 0 | 0 hsa-miR-15 | -0.46 | -0.46 N/A |      |
| 1 | 0 | 0 | 0 hsa-miR-15 | -0.46 | -0.46 N/A |      |
| 0 | 2 | 0 | 1 hsa-miR-15 | -0.45 | -0.45 N/A |      |
| 1 | 0 | 0 | 0 hsa-miR-15 | -0.45 | -0.45 N/A |      |
| 1 | 0 | 0 | 0 hsa-miR-15 | -0.45 | -0.45 N/A |      |
| 1 | 0 | 0 | 0 hsa-miR-15 | -0.45 | -0.51 N/A |      |
| 0 | 0 | 1 | 1 hsa-miR-15 | -0.45 | -0.45 N/A | 2007 |
| 0 | 0 | 3 | 0 hsa-miR-15 | -0.44 | -0.46 N/A |      |
| 0 | 2 | 1 | 0 hsa-miR-15 | -0.44 | -0.47 N/A |      |
| 1 | 0 | 0 | 0 hsa-miR-15 | -0.44 | -0.44 N/A |      |
| 1 | 0 | 0 | 0 hsa-miR-15 | -0.44 | -0.44 N/A |      |
| 1 | 0 | 0 | 0 hsa-miR-15 | -0.43 | -0.43 N/A |      |
| 1 | 0 | 0 | 0 hsa-miR-15 | -0.43 | -0.46 N/A |      |
| 0 | 0 | 0 | 0 hsa-miR-15 | -0.42 | -0.42 N/A |      |
| 0 | 2 | 0 | 0 hsa-miR-15 | -0.42 | -0.58 N/A | 2007 |
| 1 | 0 | 0 | 0 hsa-miR-15 | -0.42 | -0.47 N/A |      |
| 1 | 0 | 0 | 0 hsa-miR-15 | -0.42 | -0.42 N/A |      |
| 1 | 0 | 0 | 0 hsa-miR-15 | -0.42 | -0.42 N/A |      |
| 1 | 0 | 0 | 0 hsa-miR-15 | -0.42 | -0.42 N/A |      |
| 0 | 1 | 1 | 1 hsa-miR-15 | -0.41 | -0.45 N/A |      |
| 1 | 0 | 0 | 0 hsa-miR-15 | -0.4  | -0.4 N/A  |      |
| 0 | 1 | 0 | 0 hsa-miR-15 | -0.4  | -0.4 N/A  | 2007 |
| 1 | 0 | 0 | 1 hsa-miR-15 | -0.4  | -0.4 N/A  |      |
| 1 | 0 | 0 | 1 hsa-miR-15 | -0.4  | -0.54 N/A |      |
| 1 | 0 | 1 | 0 hsa-miR-15 | -0.4  | -0.6 N/A  |      |
| 0 | 1 | 0 | 0 hsa-miR-15 | -0.4  | -0.4 N/A  |      |
| 0 | 1 | 1 | 0 hsa-miR-15 | -0.4  | -0.4 N/A  |      |
| 1 | 0 | 0 | 0 hsa-miR-15 | -0.4  | -0.4 N/A  |      |
| 0 | 1 | 0 | 0 hsa-miR-15 | -0.39 | -0.39 N/A |      |
| 1 | 0 | 0 | 0 hsa-miR-15 | -0.39 | -0.39 N/A |      |
| 1 | 0 | 0 | 0 hsa-miR-15 | -0.39 | -0.39 N/A |      |
| 0 | 1 | 0 | 0 hsa-miR-15 | -0.39 | -0.39 N/A |      |
| 0 | 0 | 2 | 1 hsa-miR-15 | -0.38 | -0.38 N/A |      |
| 1 | 1 | 0 | 0 hsa-miR-15 | -0.38 | -0.46 N/A |      |
| 0 | 1 | 0 | 0 hsa-miR-15 | -0.38 | -0.38 N/A |      |

|   |   |   |              |       |           |      |
|---|---|---|--------------|-------|-----------|------|
| 1 | 0 | 0 | 0 hsa-miR-15 | -0.38 | -0.38 N/A |      |
| 0 | 0 | 3 | 1 hsa-miR-15 | -0.38 | -0.54 N/A |      |
| 1 | 0 | 0 | 1 hsa-miR-15 | -0.38 | -0.44 N/A |      |
| 0 | 1 | 1 | 0 hsa-miR-15 | -0.38 | -0.4 N/A  |      |
| 1 | 0 | 0 | 0 hsa-miR-15 | -0.38 | -0.38 N/A |      |
| 0 | 1 | 0 | 1 hsa-miR-15 | -0.37 | -0.37 N/A |      |
| 0 | 0 | 0 | 0 hsa-miR-15 | -0.37 | -0.37 N/A | 2007 |

rgetScan publication(s)
