# Supplementary material for: Dysregulated Bone Metabolism Is Related to High Expression of miR‐151a‐3p in Severe Adolescent Idiopathic Scoliosis
Source: Hindawi journal article supplement (doi:10.1155/2020/4243015), 2020-01-01
Supplement: f1 [file 4243015.f1.zip]

# Supplementary tables

Table S2. Primers for qPCR

| Gene name                       | Primer  | Sequence (5'-3')          |
|---------------------------------|---------|---------------------------|
| <b>miR-151a-3p</b>              | Forward | GGATGCTAGACTGAAGCTCCT     |
|                                 | Reverse | CAGTGCGTGTCTGGAGT         |
| <b>miR-941</b>                  | Forward | GGCTGTGTGCACATGTG         |
|                                 | Reverse | GAACATGTCTGCGTATCTC       |
| <b>miR-148b-5p</b>              | Forward | GTTCTGTTATACACTCAGG       |
|                                 | Reverse | GAACATGTCTGCGTATCTC       |
| <b>U6</b>                       | Forward | CTCGCTTCGGCAGCACA         |
|                                 | Reverse | AACGCTTCACGAATTTGCGT      |
| <b>GAPDH</b>                    | Forward | TGTTTCGTCATGGGTGTGAAC     |
|                                 | Reverse | ATGGCATGGACTGTGGTCAT      |
| <b>GREM1</b>                    | Forward | TCATCAACCGCTTCTGTTACGGC   |
|                                 | Reverse | CAGAAGGAGCAGGACTGAAAGG    |
| <b>ME1</b>                      | Forward | GGAGTTGCTCTTGGTGTGTGG     |
|                                 | Reverse | GGATAAAGCCGACCCTCTTCCA    |
| <b>PFN2</b>                     | Forward | TCGGCTACTGCGACGCCAAATA    |
|                                 | Reverse | GATCACTGAGCATTTCTTCGCGC   |
| <b>YTHDF3</b>                   | Forward | GCTACTTTCAAGCATACACCTC    |
|                                 | Reverse | ACAGGACATCTTCATACGGTTATTG |
| <b>NAMPT</b>                    | Forward | AGGGTTACAAGTTGCTGCCACC    |
|                                 | Reverse | CTCCACCAGAACCGAAGGCAAT    |
| <b><math>\beta</math>-actin</b> | Forward | ACTCTTCCAGCCTTCCTTCC      |
|                                 | Reverse | GTACTTGCGCTCAGGAGGAG      |

Table S5. Primers for MSP

| Primer       | Sequence                     | Product size (bp) |
|--------------|------------------------------|-------------------|
| miR-151a-M-F | GAGCGTTAGGATTTATCGGG         | 175               |
| miR-151a-M-R | TCGAATAAACCTATTTAACGAAACG    |                   |
| miR-151a-U-F | GAGTGTTAGGATTATTGGGG         | 175               |
| miR-151a-U-R | TCAAATAAACCTATTTAACAAAACAACC |                   |
