# Supplementary material for: Dysregulated Bone Metabolism Is Related to High Expression of miR‐151a‐3p in Severe Adolescent Idiopathic Scoliosis
Source: Hindawi journal article supplement (doi:10.1155/2020/4243015), 2020-01-01
Supplement: f1 [file 4243015.f1.zip]

red is pvalue<=0.001,orange is pvalue <=0.01,blue is pvalue<=0.05,green is p

| Index                                                                | miR_name                    | miR_seq                   | pvalue (A |
|----------------------------------------------------------------------|-----------------------------|---------------------------|-----------|
| 1                                                                    | hsa-miR-941                 | CACCCGGCTGTGTGCACATGTGC   | #####     |
| 2                                                                    | hsa-miR-505-5p_R+1          | GGGAGCCAGGAAGTATTGATGTT   | #####     |
| 3                                                                    | hsa-miR-151a-3p             | CTAGACTGAAGCTCCTTGAGG     | #####     |
| 4                                                                    | hsa-miR-15a-5p_R-1          | TAGCAGCACATAATGGTTTGT     | #####     |
| 5                                                                    | hsa-miR-148b-5p_L+1R-1      | GAAGTTCTGTTATACACTCAGG    | #####     |
| 6                                                                    | hsa-miR-361-3p              | TCCCCCAGGTGTGATTCTGATTT   | #####     |
| 7                                                                    | hsa-miR-362-5p_R-2          | AATCCTTGGAACCTAGGTGTGA    | #####     |
| 8                                                                    | hsa-miR-1301-3p_R+1         | TTGCAGCTGCCTGGGAGTGA CTCT | #####     |
| 9                                                                    | hsa-miR-30c-5p_R-2          | TGTAAACATCCTACACTCTCA     | #####     |
| 10                                                                   | hsa-miR-30b-5p              | TGTAAACATCCTACACTCAGCT    | #####     |
| 11                                                                   | hsa-miR-24-2-5p_L+1R-1      | GTGCCTACTGAGCTGAAACACA    | #####     |
| 12                                                                   | hsa-miR-130b-3p             | CAGTGCAATGATGAAAGGGCAT    | #####     |
| 13                                                                   | hsa-miR-17-3p               | ACTGCAGTGAAGGCACCTGTAG    | #####     |
| 14                                                                   | hsa-miR-19b-1-5p_1ss23CA    | AGTTTTGCAGGTTTGCATCCAGA   | #####     |
| 15                                                                   | PC-3p-1965_2907             | ATTCCAACGTTCCCGTGG        | #####     |
| 16                                                                   | hsa-miR-29c-5p_R-1          | TGACCGATTTCTCCTGGTGTT     | #####     |
| 17                                                                   | hsa-miR-328-3p              | CTGGCCCTCTCTGCCCTTCCGT    | #####     |
| 18                                                                   | hsa-miR-107_R-2             | AGCAGCATTTGTACAGGGCTAT    | #####     |
| 19                                                                   | PC-5p-18146_189             | CCAATCACGTTCCCGTGG        | #####     |
| 20                                                                   | hsa-miR-18a-5p_R-1          | TAAGGTGCATCTAGTGCAGATA    | #####     |
| 21                                                                   | hsa-miR-503-5p_R-2_1ss21CA  | TAGCAGCGGGAACAGTTCTGA     | #####     |
| 22                                                                   | cgr-miR-1839-5p             | AAGGTAGATAGAACAGGTCTTGT   | #####     |
| 23                                                                   | hsa-miR-92a-3p              | TATTGCACTTGTCCCGGCTGT     | #####     |
| 24                                                                   | hsa-miR-196b-5p_R-1         | TAGGTAGTTTCTGTGTTGG       | #####     |
| 25                                                                   | hsa-miR-32-5p_R-1           | TATTGCACATTACTAAGTTGC     | #####     |
| 26                                                                   | hsa-miR-16-5p               | TAGCAGCACGTAAATATTGGCG    | #####     |
| 27                                                                   | hsa-miR-744-5p              | TGCGGGGCTAGGGCTAACAGCA    | #####     |
| 28                                                                   | hsa-let-7d-5p               | AGAGGTAGTAGGTTGCATAGTT    | #####     |
| 29                                                                   | hsa-miR-324-5p_R-1          | CGCATCCCCTAGGGCATTGGTG    | #####     |
| 30                                                                   | hsa-mir-216b-p3_2ss11AT17AG | TCACACACTTTCCCGTGG        | #####     |
| 31                                                                   | hsa-miR-501-5p_R+1          | AATCCTTTGTCCCTGGGTGAGAG   | #####     |
| 32                                                                   | hsa-miR-423-3p              | AGCTCGGTCTGAGGCCCTCAGT    | #####     |
| Following miRNAs do not show significant difference (p-value<=0.05). |                             |                           |           |
| 33                                                                   | hsa-miR-22-3p               | AAGCTGCCAGTTGAAGAACTGT    | #####     |
| 34                                                                   | hsa-miR-185-3p_R-1          | AGGGGCTGGCTTTCTCTGGT      | #####     |
| 35                                                                   | hsa-miR-2355-3p_L-2R+2      | TGTCTTGCTGTTTGAGATAA      | #####     |
| 36                                                                   | hsa-let-7g-5p               | TGAGGTAGTAGTTTGTACAGTT    | #####     |
| 37                                                                   | hsa-miR-142-5p_L+2R-2       | CCCATAAAGTAGAAAGCACTA     | #####     |
| 38                                                                   | hsa-miR-125b-5p             | TCCCTGAGACCCTAACTTGTA     | #####     |
| 39                                                                   | hsa-miR-550a-3p_R-1         | TGTCTTACTCCCTCAGGCACA     | #####     |
| 40                                                                   | cgr-miR-1839-3p_R-1         | AGACCTACTTATCTACCAACA     | #####     |
| 41                                                                   | hsa-miR-126-5p              | CATTATTACTTTTGGTACGCG     | #####     |
| 42                                                                   | mmu-let-7j_R-2              | TGAGGTATTAGTTTGTGCTGTT    | #####     |
| 43                                                                   | hsa-miR-185-5p              | TGGAGAGAAAGGCAGTTCCTGA    | #####     |
| 44                                                                   | hsa-miR-942-5p_R+1          | TCTTCTCTGTTTTGGCCATGTGA   | #####     |
| 45                                                                   | hsa-miR-409-3p              | GAATGTTGCTCGGTGAACCCCT    | #####     |
| 46                                                                   | hsa-miR-17-5p               | CAAAGTGCTTACAGTGCAGGTAG   | #####     |
| 47                                                                   | hsa-miR-106a-5p_1ss1AC      | CAAAGTGCTTACAGTGCAGGTAG   | #####     |

|    |                        |                          |       |
|----|------------------------|--------------------------|-------|
| 48 | hsa-miR-182-5p_R-2     | TTTGGCAATGGTAGAACTCACA   | ##### |
| 49 | hsa-miR-664a-3p        | TATTCATTTATCCCCAGCCTACA  | ##### |
| 50 | hsa-miR-4433b-5p_R+1   | ATGTCCCACCCCCACTCCTGTT   | ##### |
| 51 | hsa-miR-93-5p          | CAAAGTGCTGTTTCGTGCAGGTAG | ##### |
| 52 | hsa-miR-210-3p         | CTGTGCGTGTGACAGCGGCTGA   | ##### |
| 53 | hsa-miR-223-5p_R+1     | CGTGTATTTGACAAGCTGAGTTG  | ##### |
| 54 | PC-5p-15457_231        | TCCCCCACTGTCCCGTGG       | ##### |
| 55 | hsa-miR-628-5p         | ATGCTGACATATTTACTAGAGG   | ##### |
| 56 | hsa-miR-190a-5p_R-1    | TGATATGTTTGATATATTAGG    | ##### |
| 57 | hsa-miR-651-5p_R-1     | TTTAGGATAAGCTTGACTTTT    | ##### |
| 58 | hsa-miR-10b-5p_R-1     | TACCTGTAGAACCGAATTTGT    | ##### |
| 59 | hsa-miR-100-5p_R-1     | AACCCGTAGATCCGAAC TTGT   | ##### |
| 60 | hsa-miR-3158-3p_R-1    | AAGGGCTTCCTCTCTGCAGGA    | ##### |
| 61 | hsa-miR-101-3p_R+1     | TACAGTACTGTGATAACTGAAG   | ##### |
| 62 | hsa-mir-106a-p3        | TACTGCAATGTAAGCACTTCT    | ##### |
| 63 | hsa-miR-28-3p          | CACTAGATTGTGAGCTCCTGGA   | ##### |
| 64 | hsa-miR-144-3p         | TACAGTATAGATGATGTACT     | ##### |
| 65 | hsa-miR-151a-5p        | TCGAGGAGCTCACAGTCTAGT    | ##### |
| 66 | hsa-miR-126-3p         | TCGTACCGTGAGTAATAATGCG   | ##### |
| 67 | hsa-miR-511-5p         | GTGTCTTTTGCTCTGCAGTCA    | ##### |
| 68 | hsa-miR-7-1-3p         | CAACAAATCACAGTCTGCCATA   | ##### |
| 69 | cgr-miR-486-5p_R+2     | TCCTGTACTGAGCTGCCCCGAGGT | ##### |
| 70 | hsa-miR-27a-3p_R-1     | TTCACAGTGGCTAAGTTCCG     | ##### |
| 71 | hsa-miR-103a-3p        | AGCAGCATTGTACAGGGCTATGA  | ##### |
| 72 | mdo-miR-22-3p          | AAGCTGCCAGTTGAAGAACTGC   | ##### |
| 73 | hsa-miR-25-3p          | CATTGCACTTGTCTCGGTCTGA   | ##### |
| 74 | hsa-miR-628-3p_R+2     | TCTAGTAAGAGTGGCAGTCGAAG  | ##### |
| 75 | hsa-miR-139-5p         | TCTACAGTGCACGTGTCTCCAGT  | ##### |
| 76 | hsa-miR-450a-5p        | TTTTGCGATGTGTTTCCTAATAT  | ##### |
| 77 | hsa-let-7i-5p          | TGAGGTAGTAGTTTGCTGTT     | ##### |
| 78 | hsa-miR-618            | AAACTCTACTTGTCCTTCTGAGT  | ##### |
| 79 | hsa-miR-374a-3p        | CTTATCAGATTGTATTGTAATT   | ##### |
| 80 | hsa-miR-146b-5p_R+2    | TGAGAACTGAATTCCATAGGCTGT | ##### |
| 81 | hsa-miR-30e-3p_1ss22CT | CTTTCAGTCGGATGTTTACAGT   | ##### |
| 82 | hsa-miR-2110_R+1       | TTGGGGAAACGGCCGCTGAGTGA  | ##### |
| 83 | hsa-miR-625-5p_R+1     | AGGGGGAAAGTTCTATAGTCCT   | ##### |
| 84 | hsa-miR-548e-3p        | AAAAACTGAGACTACTTTTGCA   | ##### |
| 85 | hsa-miR-877-5p_R+2     | GTAGAGGAGATGGCGCAGGGGA   | ##### |
| 86 | hsa-miR-543_R+1        | AAACATTCGCGGTGCACTTCTTT  | ##### |
| 87 | hsa-miR-99b-5p         | CACCCGTAGAACCACCTTGCG    | ##### |
| 88 | hsa-miR-183-5p         | TATGGCACTGGTAGAATTCACT   | ##### |
| 89 | hsa-miR-214-5p         | TGCCTGTCTACACTTGCTGTGC   | ##### |
| 90 | hsa-miR-335-5p_R-1     | TCAAGAGCAATAACGAAAAATG   | ##### |
| 91 | hsa-miR-484_R-1        | TCAGGCTCAGTCCCCCTCCCGA   | ##### |
| 92 | hsa-miR-141-3p_R-1     | TAACACTGTCTGGTAAAGATG    | ##### |
| 93 | hsa-let-7b-5p          | TGAGGTAGTAGGTTGTGTGGTT   | ##### |
| 94 | hsa-miR-532-5p         | CATGCCTTGAGTGTAGGACCGT   | ##### |
| 95 | hsa-miR-5010-5p_R-1    | AGGGGGATGGCAGAGCAAAAT    | ##### |
| 96 | hsa-miR-106b-5p_R-1    | TAAAGTGCTGACAGTGCAGA     | ##### |
| 97 | hsa-miR-29a-3p         | TAGCACCATCTGAAATCGGTTA   | ##### |

|     |                            |                          |       |
|-----|----------------------------|--------------------------|-------|
| 98  | hsa-miR-199a-3p            | ACAGTAGTCTGCACATTGGTTA   | ##### |
| 99  | hsa-miR-181a-5p_R-1        | AACATTCAACGCTGTCGGTGAG   | ##### |
| 100 | hsa-miR-374a-5p_R+1        | TTATAATACAACCTGATAAGTGA  | ##### |
| 101 | hsa-miR-301a-3p            | CAGTGCAATAGTATTGTCAAAGC  | ##### |
| 102 | hsa-miR-222-3p             | AGCTACATCTGGCTACTGGGT    | ##### |
| 103 | hsa-miR-3200-5p_R+1        | AATCTGAGAAGGCGCACAGGTT   | ##### |
| 104 | hsa-miR-4732-5p            | TGTAGAGCAGGGAGCAGGAAGCT  | ##### |
| 105 | hsa-let-7f-5p              | TGAGGTAGTAGATTGTATAGTT   | ##### |
| 106 | hsa-miR-34a-5p             | TGGCAGTGTCTTAGCTGGTTGT   | ##### |
| 107 | hsa-miR-7641_L+4R+1_1ss5TC | TCGTCTGATCTCGGAAGCTAAGCA | ##### |
| 108 | hsa-miR-29b-3p_R-2         | TAGCACCATTGTGAAATCAGTG   | ##### |
| 109 | hsa-miR-20a-5p_R-1         | TAAAGTGCTTATAGTGCAGGTA   | ##### |
| 110 | hsa-miR-144-5p             | GGATATCATCATATACTGTAAG   | ##### |
| 111 | hsa-miR-150-5p             | TCTCCCAACCCCTTGTACCAGTG  | ##### |
| 112 | hsa-miR-205-5p_R-1         | TCCTTCATTCCACCGGAGTCT    | ##### |
| 113 | hsa-miR-1180-3p            | TTTCCGGCTCGCGTGGGTGTGT   | ##### |
| 114 | hsa-miR-200c-3p            | TAATACTGCCGGGTAATGATGGA  | ##### |
| 115 | hsa-miR-223-3p_R+1         | TGTCAGTTTGTCAAATACCCCAA  | ##### |
| 116 | hsa-miR-145-3p             | GGATTCTCGGAAATACTGTTCT   | ##### |
| 117 | hsa-miR-425-5p             | AATGACACGATCACTCCCGTTGA  | ##### |
| 118 | hsa-miR-133a-3p_L-1R+1     | TTGGTCCCCTTCAACCAGCTGT   | ##### |
| 119 | hsa-miR-375                | TTTGTTCGTTTCGGCTCGCGTGA  | ##### |
| 120 | hsa-miR-502-3p             | AATGCACCTGGGCAAGGATTCA   | ##### |
| 121 | hsa-miR-101-5p_L+1R-2      | TCAGTTATCACAGTGCTGATG    | ##### |
| 122 | hsa-miR-363-3p_R-1         | AATTGCACGGTATCCATCTGT    | ##### |
| 123 | hsa-miR-128-3p             | TCACAGTGAACCGGTCTCTTT    | ##### |
| 124 | hsa-miR-542-3p             | TGTGACAGATTGATAACTGAAA   | ##### |
| 125 | hsa-miR-21-5p              | TAGCTTATCAGACTGATGTTGA   | ##### |
| 126 | hsa-miR-96-5p_R-2          | TTTGGCACTAGCACATTTTTG    | ##### |
| 127 | hsa-miR-203a-3p            | GTGAAATGTTTAGGACCACTAG   | ##### |
| 128 | hsa-miR-146a-5p            | TGAGAACTGAATTCCATGGGTT   | ##### |
| 129 | hsa-miR-92b-3p_R-2         | TATTGCACTCGTCCCGGCCCT    | ##### |
| 130 | bta-miR-16b_L+1R+1         | GTAGCAGCACGTAAATATTGGCG  | ##### |
| 131 | hsa-miR-18a-3p_R-2         | ACTGCCCTAAGTGCTCCTTCT    | ##### |
| 132 | hsa-miR-1226-3p            | TCACCAGCCCTGTGTTCCCTAG   | ##### |
| 133 | hsa-miR-4732-3p            | GCCCTGACCTGTCTGTTCTG     | ##### |
| 134 | hsa-miR-29c-3p_R-1         | TAGCACCATTGTGAAATCGGTT   | ##### |
| 135 | hsa-miR-1307-3p_R+1        | ACTCGGCGTGGCGTCGGTCGTGG  | ##### |
| 136 | hsa-miR-20a-3p_R+1         | ACTGCATTATGAGCACTTAAAGT  | ##### |
| 137 | hsa-miR-1255b-5p           | CGGATGAGCAAAGAAAGTGTT    | ##### |
| 138 | hsa-miR-10a-5p_R-1         | TACCCTGTAGATCCGAATTTGT   | ##### |
| 139 | hsa-miR-1260a_R+3_1ss9TG   | ATCCCACCGCTGCCACCAAAA    | ##### |
| 140 | hsa-let-7f-1-3p_1ss22CT    | CTATACAATCTATTGCCTTCCT   | ##### |
| 141 | hsa-miR-338-3p_R+1         | TCCAGCATCAGTGATTTTGTTGA  | ##### |
| 142 | hsa-miR-874-3p             | CTGCCCTGGCCCGAGGGACCGA   | ##### |
| 143 | hsa-miR-660-5p             | TACCCATTGCATATCGGAGTTG   | ##### |
| 144 | mdo-miR-106-5p_R-1         | AAAAGTGCTTATAGTGCAGGTA   | ##### |
| 145 | hsa-miR-98-5p              | TGAGGTAGTAAGTTGTATTGTT   | ##### |
| 146 | hsa-miR-200a-3p_R+1        | TAACACTGTCTGGTAACGATGTT  | ##### |
| 147 | hsa-miR-378c_R-5           | ACTGGACTTGAGTCAGAAG      | ##### |

|     |                        |                            |       |
|-----|------------------------|----------------------------|-------|
| 148 | hsa-miR-425-3p_L+1R-1  | CATCGGGAATGTCGTGTCGCC      | ##### |
| 149 | hsa-miR-15b-3p_R-1     | CGAATCATTATTTGCTGCTCT      | ##### |
| 150 | hsa-miR-532-3p         | CCTCCCACACCCAAGGCTTGCA     | ##### |
| 151 | hsa-miR-31-5p_R+2      | AGGCAAGATGCTGGCATAGCTGT    | ##### |
| 152 | hsa-miR-1306-5p_R-1    | CCACCTCCCCTGCAAACGTCC      | ##### |
| 153 | hsa-miR-191-5p_R-1     | CAACGGAATCCCAAAAGCAGCT     | ##### |
| 154 | hsa-miR-200b-3p        | TAATACTGCCTGGTAATGATGA     | ##### |
| 155 | hsa-miR-324-3p_R+1     | ACTGCCCCAGGTGCTGCTGGT      | ##### |
| 156 | hsa-miR-145-5p         | GTCCAGTTTTCCCAGGAATCCCT    | ##### |
| 157 | hsa-let-7i-3p_R-1      | CTGCGCAAGCTACTGCCTTGC      | ##### |
| 158 | hsa-miR-495-3p_R+1     | AAACAAACATGGTGCACCTTCTTT   | ##### |
| 159 | hsa-let-7b-3p_R-1      | CTATACAACCTACTGCCTTCC      | ##### |
| 160 | hsa-miR-215-5p_R+1     | ATGACCTATGAATTGACAGACA     | ##### |
| 161 | hsa-miR-589-5p_R-1     | TGAGAACCACGTCTGCTCTGA      | ##### |
| 162 | hsa-miR-27b-3p         | TTCACAGTGGCTAAGTTCTGC      | ##### |
| 163 | hsa-miR-106b-3p_R-2    | CCGCACTGTGGGTACTTGCT       | ##### |
| 164 | hsa-miR-429            | TAATACTGTCTGGTAAAACCGT     | ##### |
| 165 | hsa-miR-135b-5p        | TATGGCTTTTCATTCCCTATGTGA   | ##### |
| 166 | hsa-miR-340-5p_1ss5AC  | TTATCAAGCAATGAGACTGATT     | ##### |
| 167 | hsa-miR-103a-2-5p_R+1  | AGCTTCTTTACAGTGCTGCCTTGA   | ##### |
| 168 | hsa-miR-122-3p_R-1     | AACGCCATTATCACACTAAAT      | ##### |
| 169 | hsa-miR-26b-5p_R+1     | TTCAAGTAATTCAGGATAGGTT     | ##### |
| 170 | hsa-miR-497-5p         | CAGCAGCACACTGTGGTTTGT      | ##### |
| 171 | hsa-miR-148a-3p        | TCAGTGCACCTACAGAACTTTGT    | ##### |
| 172 | hsa-miR-181d-5p_R+1    | AACATTCAATTGTTGTGCGGTGGGTT | ##### |
| 173 | hsa-miR-127-3p         | TCGGATCCGTCTGAGCTTGGCT     | ##### |
| 174 | hsa-miR-21-3p          | CAACACCAGTCGATGGGCTGT      | ##### |
| 175 | hsa-miR-1537-5p        | AGCTGTAATTAGTCAGTTTTCT     | ##### |
| 176 | hsa-miR-140-3p_L-1R+1  | ACCACAGGGTAGAACCACGGA      | ##### |
| 177 | hsa-miR-500a-3p_L+1R-3 | AATGCACCTGGGCAAGGATT       | ##### |
| 178 | hsa-miR-501-3p         | AATGCACCCGGGCAAGGATTCT     | ##### |
| 179 | hsa-miR-194-5p         | TGTAACAGCAACTCCATGTGGA     | ##### |
| 180 | hsa-miR-31-3p_R+1      | TGCTATGCCAACATATTGCCATC    | ##### |
| 181 | hsa-miR-301b-3p        | CAGTGCAATGATATTGTCAAAGC    | ##### |
| 182 | hsa-miR-629-5p         | TGGGTTTACGTTGGGAGAACT      | ##### |
| 183 | hsa-miR-34c-5p         | AGGCAGTGTAGTTAGCTGATTGC    | ##### |
| 184 | hsa-miR-493-5p         | TTGTACATGGTAGGCTTTCATT     | ##### |
| 185 | hsa-miR-20b-5p_R-1     | CAAAGTGCTCATAGTGCAGGTA     | ##### |
| 186 | hsa-miR-590-5p         | GAGCTTATTTCATAAAAAGTGCAG   | ##### |
| 187 | hsa-miR-326_R+1        | CCTCTGGGCCCCCTCCTCCAGT     | ##### |
| 188 | hsa-miR-192-5p         | CTGACCTATGAATTGACAGCC      | ##### |
| 189 | hsa-miR-1307-5p        | TCGACCGGACCTCGACCGGCT      | ##### |
| 190 | hsa-miR-625-3p         | GACTATAGAACTTTCCCCCTCA     | ##### |
| 191 | hsa-miR-143-5p_R-1     | GGTGCAGTGCTGCATCTCTGG      | ##### |
| 192 | hsa-miR-627-5p         | GTGAGTCTCTAAGAAAAGAGGA     | ##### |
| 193 | hsa-miR-193b-5p        | CGGGGTTTTGAGGGCGAGATGA     | ##### |
| 194 | hsa-miR-362-3p         | AACACACCTATTCAAGGATTCA     | ##### |
| 195 | hsa-miR-199a-5p        | CCCAGTGTTGAGCTACCTGTTC     | ##### |
| 196 | hsa-miR-134-5p         | TGTGACTGGTTGACCAGAGGGG     | ##### |
| 197 | hsa-let-7a-5p_R-1      | TGAGGTAGTAGGTTGTATAGT      | ##### |

|     |                            |                          |       |
|-----|----------------------------|--------------------------|-------|
| 198 | hsa-miR-3615_R+1           | TCTCTCGGCTCCTCGCGGCTCG   | ##### |
| 199 | hsa-miR-18b-5p_R-2         | TAAGGTGCATCTAGTGCAGTT    | ##### |
| 200 | hsa-miR-10a-3p_R-1         | CAAATTCGTATCTAGGGGAAT    | ##### |
| 201 | hsa-miR-337-5p             | GAACGGCTTCATACAGGAGTT    | ##### |
| 202 | hsa-miR-450b-5p_R-1        | TTTTGCAATATGTTCTGAAT     | ##### |
| 203 | hsa-miR-500b-5p_L+1R+4     | TAATCCTTGCTACCTGGGTGAGA  | ##### |
| 204 | hsa-miR-30e-5p_R+2         | TGTAAACATCCTTGACTGGAAGCT | ##### |
| 205 | hsa-miR-143-3p_R+1         | TGAGATGAAGCACTGTAGCTCT   | ##### |
| 206 | hsa-miR-424-3p             | CAAAACGTGAGGCGCTGCTAT    | ##### |
| 207 | hsa-mir-451a-p3            | TTTAGTAATGGTAATGGTTCT    | ##### |
| 208 | hsa-miR-483-5p_R+1_1ss22GA | AAGACGGGAGGAAAGAAGGAAA   | ##### |
| 209 | hsa-miR-548q_L-1R+2        | CTGGTGCAAAAGTAATGGCGGTT  | ##### |
| 210 | hsa-miR-4508_L+2R-1        | AAGCGGGGCTGGGCGCGC       | ##### |
| 211 | hsa-miR-376c-3p            | AACATAGAGGAAATTCCACGT    | ##### |
| 212 | hsa-let-7f-2-3p_1ss22CT    | CTATACAGTCTACTGTCTTTCT   | ##### |
| 213 | hsa-miR-29b-2-5p_R+1       | CTGGTTTCACATGGTGGCTTAGA  | ##### |
| 214 | hsa-miR-136-3p             | CATCATCGTCTCAAATGAGTCT   | ##### |
| 215 | hsa-miR-221-5p             | ACCTGGCATACAATGTAGATTT   | ##### |
| 216 | hsa-miR-296-5p             | AGGGCCCCCCTCAATCCTGT     | ##### |
| 217 | hsa-miR-125a-5p_R-2        | TCCCTGAGACCCCTTTAACCTGT  | ##### |
| 218 | hsa-miR-381-3p             | TATACAAGGGCAAGCTCTCTGT   | ##### |
| 219 | hsa-miR-4772-5p            | TGATCAGGCAAAATTGCAGACT   | ##### |
| 220 | hsa-miR-660-3p_R+2         | ACCTCCTGTGTGCATGGATTACA  | ##### |
| 221 | hsa-miR-483-3p_L-1R+2      | CACTCCTCTCCTCCCGTCTTCT   | ##### |
| 222 | hsa-miR-193b-3p            | AACTGGCCCTCAAAGTCCCGCT   | ##### |
| 223 | hsa-miR-199b-5p_R-1        | CCCAGTGTTTAGACTATCTGTT   | ##### |
| 224 | hsa-miR-99a-5p_R-1         | AACCCGTAGATCCGATCTTGT    | ##### |
| 225 | hsa-miR-624-5p             | TAGTACCAGTACCTTGTGTTCA   | ##### |
| 226 | hsa-miR-376a-3p_1ss6AG     | ATCATGGAGGAAAATCCACGT    | ##### |
| 227 | ptr-miR-320d_R+4           | AAAAGCTGGGTTGAGAGGGAAA   | ##### |
| 228 | mm1-miR-320b_1ss20CA       | AAAAGCTGGGTTGAGAGGGAAA   | ##### |
| 229 | hsa-miR-331-3p             | GCCCCGCGGCTATCCTAGAA     | ##### |
| 230 | hsa-miR-10b-3p_L-2         | AGATTCGATTCTAGGGGAAT     | ##### |
| 231 | hsa-miR-190b_R+1           | TGATATGTTTGATATTGGGTTG   | ##### |
| 232 | hsa-miR-7-5p               | TGGAAGACTAGTGATTTTGTGT   | ##### |
| 233 | hsa-miR-487a-3p            | AATCATACAGGGACATCCAGTT   | ##### |
| 234 | hsa-miR-19a-3p             | TGTGCAAATCTATGCAAACTGA   | ##### |
| 235 | hsa-miR-122-5p             | TGGAGTGTGACAATGGTGTGTTG  | ##### |
| 236 | hsa-miR-433-3p             | ATCATGATGGGCTCCTCGGTGT   | ##### |
| 237 | hsa-miR-197-3p             | TTCACCACCTTCTCCACCCAGC   | ##### |
| 238 | hsa-miR-329-3p_L-1R+1      | ACACACCTGGTTAACCTCTTTA   | ##### |
| 239 | hsa-miR-1228-5p            | GTGGGCGGGGCGAGGTGTGTG    | ##### |
| 240 | hsa-miR-675-3p_L-1R+2      | TGTATGCCCTCACCGCTCAGC    | ##### |
| 241 | hsa-miR-3940-3p_R-1        | CAGCCCGGATCCCAGCCCACT    | ##### |
| 242 | hsa-miR-598-3p             | TACGTCATCGTTGTCATCGTCA   | ##### |
| 243 | hsa-miR-337-3p_L-1         | TCCTATATGATGCCTTTCTTC    | ##### |
| 244 | hsa-miR-579-3p             | TTCATTTGGTATAAACCGCGATT  | ##### |
| 245 | hsa-miR-320c_R-1           | AAAAGCTGGGTTGAGAGGG      | ##### |
| 246 | hsa-miR-193a-5p            | TGGGTCTTTGCGGGCGGAGATGA  | ##### |
| 247 | hsa-miR-152-3p             | TCAGTGCATGACAGAACTTGG    | ##### |

|     |                          |                           |       |
|-----|--------------------------|---------------------------|-------|
| 248 | hsa-miR-148b-3p          | TCAGTGCATCACAGAACTTTGT    | ##### |
| 249 | hsa-miR-204-5p           | TTCCCTTTGTGCATCCTATGCCT   | ##### |
| 250 | hsa-mir-3656-p3_1ss17AC  | CGGGTGCGGGGGTGGGCGG       | ##### |
| 251 | hsa-miR-3143_R-4         | ATAACATTGTAAAGCGCTTCT     | ##### |
| 252 | hsa-miR-5010-3p          | TTTTGTGTCTCCCATTCCCCAG    | ##### |
| 253 | hsa-miR-1908-5p_R-1      | CGGCGGGGACGGCGATTGGT      | ##### |
| 254 | hsa-miR-16-2-3p_L+1R-2   | ACCAATATTACTGTGCTGCTT     | ##### |
| 255 | hsa-miR-30d-5p           | TGTAAACATCCCCGACTGGAAG    | ##### |
| 256 | hsa-miR-26a-5p           | TTCAAGTAATCCAGGATAGGCT    | ##### |
| 257 | hsa-miR-582-5p           | TTACAGTTGTTCAACCAGTTACT   | ##### |
| 258 | PC-3p-25234_121          | GGAGGGCGCGCGGGTCGG        | ##### |
| 259 | hsa-miR-30a-3p_R-1       | CTTTCAGTCGGATGTTTGCAG     | ##### |
| 260 | hsa-miR-142-3p_L-1       | GTAGTGTTTCTACTTTATGGA     | ##### |
| 261 | hsa-miR-369-3p           | AATAATACATGGTTGATCTTT     | ##### |
| 262 | hsa-miR-221-3p_R-1       | AGCTACATTGTCTGCTGGGTTT    | ##### |
| 263 | hsa-miR-188-5p_R+1       | CATCCCTTGCATGGTGGAGGGT    | ##### |
| 264 | hsa-miR-140-5p           | CAGTGGTTTTACCCTATGGTAG    | ##### |
| 265 | hsa-miR-155-5p           | TTAATGCTAATCGTGATAGGGGT   | ##### |
| 266 | hsa-let-7d-3p            | CTATACGACCTGCTGCCTTTCT    | ##### |
| 267 | hsa-miR-30a-5p           | TGTAAACATCCTCGACTGGAAG    | ##### |
| 268 | hsa-miR-576-5p_R+1       | ATTCTAATTTCTCCACGTCTTTG   | ##### |
| 269 | hsa-miR-320d_R-1         | AAAAGCTGGGTTGAGAGG        | ##### |
| 270 | hsa-miR-26b-3p_R-1       | CCTGTCTCCATTACTTGGCT      | ##### |
| 271 | hsa-miR-135a-5p          | TATGGCTTTTTATTCCCTATGTGA  | ##### |
| 272 | hsa-miR-9-3p             | ATAAAGCTAGATAACCGAAAGT    | ##### |
| 273 | hsa-miR-195-5p_R+1       | TAGCAGCACAGAAATATTGGCA    | ##### |
| 274 | hsa-miR-15b-5p           | TAGCAGCACATCATGGTTTACA    | ##### |
| 275 | hsa-miR-320a             | AAAAGCTGGGTTGAGAGGGCGA    | ##### |
| 276 | hsa-miR-1260b_R+1_1ss9AG | ATCCCACCGCTGCCACCATT      | ##### |
| 277 | hsa-miR-590-3p           | TAATTTTATGTATAAGCTAGT     | ##### |
| 278 | hsa-miR-24-3p            | TGGCTCAGTTCAGCAGGAACAG    | ##### |
| 279 | hsa-miR-1-3p             | TGGAATGTAAAGAAGTATGTAT    | ##### |
| 280 | hsa-miR-33a-5p_R-1       | GTGCATTGTAGTTGCATTGC      | ##### |
| 281 | hsa-miR-486-3p           | CGGGGCAGCTCAGTACAGGAT     | ##### |
| 282 | hsa-miR-423-5p           | TGAGGGGCAGAGAGCGAGACTTT   | ##### |
| 283 | hsa-miR-424-5p_R-1       | CAGCAGCAATTCATGTTTTGA     | ##### |
| 284 | hsa-miR-181b-5p_R+1      | AACATTTCATTGCTGTCGGTGGGTT | ##### |
| 285 | hsa-miR-550a-3-5p        | AGTGCCTGAGGGAGTAAGAG      | ##### |
| 286 | hsa-miR-550a-5p_R-3      | AGTGCCTGAGGGAGTAAGAG      | ##### |
| 287 | hsa-miR-377-3p           | ATCACACAAAGGCAACTTTTGT    | ##### |
| 288 | hsa-miR-335-3p           | TTTTTCATTATTGCTCCTGACC    | ##### |
| 289 | hsa-miR-93-3p_R+1        | ACTGCTGAGCTAGCACTTCCCGA   | ##### |
| 290 | hsa-miR-452-5p           | AACTGTTTGAGAGGAACTGA      | ##### |
| 291 | hsa-miR-339-3p_R-3       | TGAGCGCCTCGACGACAGAG      | ##### |
| 292 | hsa-miR-505-3p           | CGTCAACACTTGCTGGTTTCCT    | ##### |
| 293 | hsa-miR-339-5p           | TCCCTGTCTCCAGGAGCTCACG    | ##### |
| 294 | hsa-miR-454-3p           | TAGTGCAATATTGCTTATAGGGT   | ##### |
| 295 | hsa-let-7a-3p            | CTATACAATCTACTGTCTTTC     | ##### |
| 296 | hsa-miR-338-5p_R-1       | AACAATATCCTGGTGCTGAGT     | ##### |
| 297 | hsa-miR-214-3p_R-1       | ACAGCAGGCACAGACAGGCAG     | ##### |

|     |                    |                          |       |
|-----|--------------------|--------------------------|-------|
| 298 | hsa-miR-1537-3p    | AAAACCGTCTAGTTACAGTTGT   | ##### |
| 299 | hsa-miR-766-3p_R-1 | ACTCCAGCCCCACAGCCTCAG    | ##### |
| 300 | hsa-miR-486-5p     | TCCTGTACTGAGCTGCCCCGAG   | ##### |
| 301 | hsa-miR-23a-3p_R+1 | ATCACATTGCCAGGGATTCCA    | ##### |
| 302 | hsa-miR-361-5p     | TTATCAGAATCTCCAGGGGTAC   | ##### |
| 303 | hsa-miR-769-5p     | TGAGACCTCTGGGTCTGAGCT    | ##### |
| 304 | hsa-miR-136-5p_R-1 | ACTCCATTTGTTTTGATGATGG   | ##### |
| 305 | hsa-miR-22-5p      | AGTTCTTCAGTGGCAAGCTTTA   | ##### |
| 306 | hsa-miR-186-5p     | CAAAGAATTCTCCTTTTGGGCT   | ##### |
| 307 | hsa-miR-451a       | AAACCGTTACCATTACTGAGTT   | ##### |
| 308 | hsa-let-7e-5p      | TGAGGTAGGAGGTTGTATAGTT   | ##### |
| 309 | hsa-miR-382-5p     | GAAGTTGTTTCGTGGTGGATTCCG | ##### |
| 310 | hsa-miR-487b-3p    | AATCGTACAGGGTCATCCACTT   | ##### |
| 311 | hsa-miR-499a-5p    | TTAAGACTTGCAGTGATGTTT    | ##### |
| 312 | hsa-miR-365b-3p    | TAATGCCCCCTAAAAATCCTTAT  | ##### |
| 313 | hsa-miR-33b-5p_R-1 | GTGCATTGCTGTTGCATTG      | ##### |
| 314 | hsa-miR-23b-3p_R+1 | ATCACATTGCCAGGGATTACCA   | ##### |
| 315 | hsa-miR-19b-3p     | TGTGCAAATCCATGCAAACTGA   | ##### |
| 316 | hsa-miR-494-3p_R+1 | TGAAACATACACGGGAAACCTCT  | ##### |

value <=0.1.

| AISFU/AI | AISFU/AI | AISFU/AI | AISFU/AI | AISFU/AI | AISO/AISO | AISO/AISO | AISO/AISO | AISO/AISO |
|----------|----------|----------|----------|----------|-----------|-----------|-----------|-----------|
| 0        | 5        | 4        | 8        | 5        | 12        | 28        | 19        | 23        |
| 0        | 5        | 6        | 4        | 0        | 15        | 12        | 19        | 23        |
| 108      | 50       | 77       | 53       | 23       | 273       | 186       | 258       | 470       |
| 3,628    | 4,966    | 3,863    | 2,588    | 2,889    | 2,199     | 2,956     | 803       | 1,428     |
| 0        | 6        | 18       | 4        | 9        | 13        | 31        | 22        | 13        |
| 0        | 6        | 6        | 7        | 13       | 14        | 9         | 9         | 12        |
| 37       | 32       | 63       | 12       | 43       | 39        | 46        | 22        | 32        |
| 0        | 5        | 3        | 0        | 13       | 12        | 8         | 16        | 5         |
| 339      | 272      | 419      | 309      | 448      | 482       | 361       | 666       | 650       |
| 419      | 481      | 638      | 369      | 590      | 770       | 604       | 529       | 620       |
| 0        | 0        | 9        | 12       | 5        | 43        | 22        | 135       | 58        |
| 31       | 51       | 47       | 48       | 9        | 32        | 41        | 0         | 25        |
| 45       | 116      | 85       | 52       | 55       | 25        | 50        | 16        | 19        |
| 0        | 3        | 3        | 4        | 0        | 4         | 4         | 0         | 5         |
| 1,288    | 227      | 385      | 276      | 183      | 139       | 104       | 76        | 77        |
| 0        | 0        | 5        | 4        | 0        | 35        | 19        | 46        | 30        |
| 4        | 9        | 19       | 26       | 0        | 30        | 15        | 22        | 24        |
| 492      | 745      | 597      | 247      | 247      | 118       | 172       | 50        | 113       |
| 113      | 6        | 20       | 16       | 0        | 6         | 3         | 0         | 0         |
| 396      | 507      | 409      | 201      | 312      | 208       | 189       | 290       | 180       |
| 0        | 6        | 5        | 4        | 9        | 3         | 0         | 0         | 0         |
| 10       | 42       | 48       | 85       | 19       | 82        | 53        | 63        | 94        |
| 3,935    | 6,809    | 2,732    | 2,552    | 2,978    | 1,899     | 3,177     | 474       | 1,378     |
| 10       | 12       | 6        | 23       | 8        | 12        | 24        | 0         | 17        |
| 166      | 296      | 135      | 143      | 160      | 140       | 195       | 35        | 73        |
| 23,356   | 37,966   | 20,885   | 11,998   | 20,313   | 11,094    | 24,297    | 2,834     | 10,135    |
| 63       | 29       | 62       | 131      | 52       | 62        | 52        | 54        | 120       |
| 1,090    | 1,121    | 1,731    | 1,433    | 814      | 2,155     | 1,200     | 925       | 1,084     |
| 55       | 69       | 68       | 35       | 39       | 26        | 41        | 16        | 24        |
| 63       | 17       | 4        | 11       | 5        | 0         | 3         | 0         | 0         |
| 0        | 8        | 10       | 0        | 5        | 5         | 18        | 25        | 2         |
| 246      | 184      | 302      | 362      | 431      | 442       | 392       | 1,659     | 814       |
| 5,228    | 3,608    | 3,881    | 3,704    | 3,695    | 2,847     | 3,705     | 1,095     | 2,178     |
| 0        | 2        | 8        | 4        | 0        | 6         | 8         | 0         | 6         |
| 0        | 0        | 0        | 4        | 0        | 10        | 0         | 0         | 14        |
| 4,123    | 5,193    | 6,433    | 3,656    | 4,920    | 8,108     | 6,322     | 3,106     | 4,335     |
| 978      | 1,242    | 1,490    | 2,426    | 938      | 2,669     | 1,714     | 1,294     | 2,531     |
| 374      | 48       | 167      | 146      | 293      | 864       | 143       | 861       | 560       |
| 8        | 5        | 6        | 0        | 0        | 6         | 4         | 0         | 3         |
| 0        | 8        | 2        | 11       | 5        | 8         | 5         | 0         | 0         |
| 1,102    | 800      | 295      | 1,555    | 414      | 691       | 339       | 76        | 223       |
| 0        | 11       | 11       | 8        | 0        | 2         | 3         | 0         | 4         |
| 1,550    | 2,458    | 2,132    | 1,171    | 1,500    | 1,019     | 1,472     | 450       | 853       |
| 0        | 14       | 9        | 4        | 0        | 15        | 16        | 0         | 14        |
| 0        | 0        | 0        | 12       | 0        | 3         | 0         | 16        | 12        |
| 1,850    | 3,628    | 2,464    | 1,414    | 1,943    | 1,003     | 1,501     | 993       | 1,198     |
| 1,850    | 3,628    | 2,464    | 1,414    | 1,943    | 1,003     | 1,501     | 993       | 1,198     |



|       |       |       |       |       |       |       |       |       |
|-------|-------|-------|-------|-------|-------|-------|-------|-------|
| 368   | 569   | 625   | 112   | 897   | 460   | 566   | 651   | 420   |
| 0     | 4     | 3     | 20    | 13    | 21    | 4     | 22    | 15    |
| 0     | 6     | 20    | 36    | 16    | 40    | 10    | 35    | 16    |
| 2,431 | 5,419 | 2,840 | 2,410 | 2,782 | 1,436 | 1,696 | 869   | 2,013 |
| 24    | 42    | 41    | 10    | 16    | 6     | 4     | 0     | 12    |
| 39    | 23    | 24    | 209   | 57    | 37    | 88    | 428   | 322   |
| 31    | 15    | 9     | 9     | 0     | 29    | 53    | 0     | 0     |
| 0     | 0     | 2     | 6     | 0     | 14    | 5     | 0     | 8     |
| 42    | 89    | 103   | 28    | 51    | 26    | 31    | 0     | 24    |
| 0     | 0     | 0     | 5     | 0     | 3     | 9     | 0     | 3     |
| 1,067 | 147   | 570   | 616   | 2,153 | 2,692 | 1,524 | 9,288 | 2,270 |
| 135   | 17    | 119   | 60    | 55    | 215   | 66    | 203   | 187   |
| 0     | 1     | 1     | 0     | 0     | 1     | 2     | 0     | 0     |
| 1,593 | 1,606 | 1,694 | 667   | 1,764 | 328   | 687   | 1,402 | 1,078 |
| 8     | 4     | 4     | 0     | 0     | 4     | 4     | 0     | 0     |
| 18    | 7     | 21    | 52    | 40    | 29    | 38    | 198   | 70    |
| 5,424 | 9,410 | 6,630 | 1,090 | 1,985 | 3,959 | 2,670 | 79    | 475   |
| 187   | 114   | 199   | 222   | 104   | 429   | 168   | 149   | 136   |
| 6,262 | 2,571 | 3,762 | 5,215 | 6,013 | 6,829 | 4,605 | 9,650 | 4,837 |
| 8     | 0     | 3     | 0     | 5     | 11    | 0     | 19    | 8     |
| 0     | 0     | 6     | 8     | 6     | 2     | 4     | 0     | 11    |
| 0     | 3     | 0     | 0     | 0     | 2     | 8     | 0     | 4     |
| 2,052 | 740   | 717   | 2,993 | 1,164 | 1,345 | 700   | 480   | 1,244 |
| 1,689 | 3,251 | 2,619 | 2,007 | 2,585 | 1,412 | 2,002 | 2,754 | 1,737 |
| 9     | 5     | 4     | 14    | 11    | 5     | 3     | 0     | 2     |
| 4,110 | 4,775 | 3,884 | 2,170 | 2,517 | 3,037 | 2,790 | 406   | 1,581 |
| 0     | 6     | 2     | 14    | 5     | 4     | 4     | 0     | 6     |
| 108   | 22    | 34    | 112   | 86    | 147   | 33    | 110   | 110   |
| 4     | 4     | 6     | 24    | 8     | 6     | 7     | 9     | 43    |
| 2,450 | 3,747 | 2,798 | 2,532 | 2,384 | 2,345 | 2,962 | 1,869 | 1,553 |
| 0     | 0     | 0     | 7     | 0     | 0     | 7     | 0     | 10    |
| 0     | 0     | 2     | 0     | 3     | 4     | 0     | 9     | 2     |
| 32    | 61    | 30    | 182   | 57    | 61    | 88    | 85    | 69    |
| 44    | 67    | 60    | 156   | 60    | 103   | 61    | 38    | 143   |
| 8     | 17    | 27    | 12    | 22    | 16    | 24    | 0     | 33    |
| 8     | 3     | 6     | 17    | 0     | 14    | 19    | 0     | 7     |
| 0     | 0     | 0     | 4     | 7     | 0     | 6     | 19    | 4     |
| 0     | 5     | 4     | 0     | 0     | 11    | 5     | 0     | 7     |
| 0     | 0     | 0     | 14    | 0     | 5     | 3     | 16    | 6     |
| 68    | 3     | 38    | 47    | 50    | 90    | 37    | 138   | 127   |
| 45    | 128   | 102   | 14    | 187   | 61    | 81    | 44    | 59    |
| 0     | 0     | 2     | 7     | 7     | 2     | 4     | 0     | 4     |
| 131   | 93    | 169   | 330   | 379   | 294   | 363   | 1,413 | 572   |
| 596   | 557   | 786   | 381   | 430   | 850   | 769   | 651   | 606   |
| 37    | 5     | 24    | 15    | 31    | 9     | 15    | 113   | 22    |
| 5,466 | 9,596 | 7,012 | 4,536 | 3,645 | 5,445 | 5,377 | 2,087 | 3,136 |
| 73    | 92    | 54    | 63    | 51    | 50    | 71    | 31    | 36    |
| 0     | 2     | 5     | 0     | 5     | 6     | 12    | 0     | 2     |
| 2,482 | 2,436 | 3,575 | 873   | 1,261 | 1,465 | 1,167 | 482   | 939   |
| 1,344 | 644   | 662   | 1,450 | 922   | 2,136 | 946   | 1,939 | 1,690 |

|       |       |       |        |       |       |        |        |        |
|-------|-------|-------|--------|-------|-------|--------|--------|--------|
| 284   | 62    | 176   | 489    | 214   | 602   | 154    | 480    | 394    |
| 276   | 322   | 230   | 348    | 329   | 276   | 233    | 258    | 251    |
| 10    | 12    | 8     | 35     | 16    | 7     | 15     | 47     | 40     |
| 27    | 79    | 59    | 55     | 71    | 18    | 51     | 66     | 46     |
| 370   | 292   | 228   | 706    | 272   | 264   | 214    | 375    | 293    |
| 0     | 11    | 20    | 0      | 11    | 5     | 30     | 16     | 4      |
| 8     | 27    | 19    | 0      | 21    | 9     | 13     | 0      | 8      |
| 1,137 | 1,292 | 1,319 | 1,902  | 1,010 | 2,631 | 1,247  | 1,054  | 1,394  |
| 13    | 0     | 7     | 20     | 0     | 0     | 3      | 0      | 15     |
| 0     | 4     | 0     | 0      | 0     | 5     | 8      | 0      | 29     |
| 92    | 163   | 122   | 100    | 120   | 223   | 179    | 131    | 128    |
| 2,835 | 5,473 | 3,579 | 1,837  | 3,726 | 2,288 | 3,315  | 2,222  | 2,062  |
| 207   | 571   | 433   | 200    | 338   | 391   | 302    | 318    | 349    |
| 958   | 799   | 678   | 603    | 1,172 | 2,390 | 1,271  | 1,369  | 575    |
| 47    | 7     | 13    | 18     | 28    | 6     | 6      | 0      | 2      |
| 15    | 15    | 22    | 4      | 0     | 12    | 13     | 0      | 0      |
| 11    | 6     | 41    | 26     | 38    | 7     | 6      | 167    | 95     |
| 5,708 | 6,394 | 5,184 | 53,632 | 7,514 | 8,374 | 11,472 | 34,683 | 74,405 |
| 0     | 0     | 13    | 7      | 0     | 48    | 5      | 0      | 37     |
| 669   | 1,029 | 987   | 799    | 583   | 682   | 936    | 570    | 598    |
| 0     | 1     | 4     | 7      | 0     | 4     | 0      | 9      | 6      |
| 318   | 23    | 250   | 77     | 522   | 315   | 81     | 142    | 189    |
| 36    | 28    | 42    | 20     | 40    | 43    | 43     | 25     | 28     |
| 18    | 28    | 15    | 6      | 9     | 12    | 4      | 0      | 5      |
| 396   | 584   | 545   | 114    | 320   | 284   | 391    | 47     | 123    |
| 23    | 25    | 36    | 89     | 15    | 78    | 31     | 42     | 65     |
| 0     | 0     | 3     | 5      | 0     | 0     | 0      | 0      | 12     |
| 7,274 | 4,209 | 7,063 | 10,621 | 9,912 | 6,973 | 7,209  | 16,224 | 7,512  |
| 142   | 395   | 253   | 45     | 423   | 303   | 428    | 145    | 129    |
| 0     | 0     | 0     | 0      | 0     | 2     | 0      | 0      | 0      |
| 262   | 196   | 213   | 795    | 226   | 172   | 207    | 129    | 221    |
| 0     | 4     | 3     | 0      | 0     | 0     | 0      | 0      | 0      |
| 18    | 33    | 17    | 9      | 26    | 3     | 21     | 19     | 12     |
| 0     | 21    | 13    | 0      | 7     | 15    | 7      | 0      | 0      |
| 0     | 2     | 3     | 0      | 0     | 0     | 0      | 0      | 0      |
| 0     | 14    | 12    | 4      | 0     | 8     | 0      | 0      | 0      |
| 400   | 287   | 220   | 341    | 271   | 272   | 232    | 378    | 275    |
| 8     | 6     | 14    | 41     | 7     | 5     | 4      | 0      | 13     |
| 0     | 8     | 8     | 18     | 12    | 6     | 12     | 35     | 23     |
| 0     | 2     | 6     | 0      | 0     | 2     | 0      | 0      | 0      |
| 315   | 61    | 251   | 216    | 593   | 810   | 368    | 2,685  | 655    |
| 0     | 0     | 3     | 0      | 0     | 4     | 0      | 0      | 0      |
| 0     | 0     | 3     | 0      | 0     | 4     | 0      | 0      | 2      |
| 13    | 13    | 13    | 103    | 14    | 23    | 12     | 76     | 130    |
| 0     | 0     | 3     | 0      | 0     | 21    | 5      | 0      | 0      |
| 145   | 209   | 149   | 123    | 237   | 109   | 178    | 88     | 101    |
| 21    | 35    | 35    | 12     | 25    | 12    | 20     | 16     | 16     |
| 81    | 128   | 98    | 214    | 43    | 88    | 60     | 16     | 74     |
| 32    | 8     | 65    | 7      | 31    | 10    | 10     | 302    | 117    |
| 37    | 13    | 43    | 10     | 14    | 6     | 6      | 0      | 9      |

|       |       |       |       |       |       |       |       |       |
|-------|-------|-------|-------|-------|-------|-------|-------|-------|
| 0     | 4     | 3     | 28    | 0     | 6     | 8     | 0     | 35    |
| 68    | 100   | 71    | 44    | 64    | 120   | 71    | 72    | 52    |
| 24    | 18    | 19    | 13    | 13    | 18    | 15    | 0     | 21    |
| 0     | 2     | 26    | 0     | 0     | 2     | 0     | 76    | 3     |
| 0     | 3     | 0     | 4     | 0     | 4     | 0     | 0     | 2     |
| 1,411 | 2,821 | 2,346 | 4,966 | 1,810 | 2,093 | 2,454 | 950   | 3,429 |
| 42    | 9     | 93    | 8     | 60    | 24    | 14    | 362   | 135   |
| 73    | 91    | 84    | 28    | 59    | 49    | 70    | 22    | 18    |
| 134   | 60    | 96    | 280   | 144   | 233   | 55    | 1,334 | 535   |
| 29    | 22    | 25    | 23    | 16    | 9     | 16    | 0     | 9     |
| 0     | 0     | 5     | 23    | 0     | 2     | 3     | 0     | 22    |
| 0     | 0     | 4     | 10    | 16    | 39    | 4     | 0     | 13    |
| 86    | 11    | 41    | 10    | 9     | 46    | 23    | 69    | 75    |
| 0     | 3     | 6     | 4     | 0     | 3     | 5     | 0     | 4     |
| 562   | 185   | 253   | 858   | 437   | 588   | 198   | 546   | 638   |
| 191   | 183   | 288   | 81    | 192   | 198   | 223   | 31    | 75    |
| 0     | 0     | 13    | 0     | 8     | 7     | 3     | 47    | 28    |
| 0     | 0     | 3     | 0     | 0     | 0     | 0     | 16    | 0     |
| 0     | 1     | 1     | 14    | 0     | 2     | 4     | 0     | 1     |
| 8     | 25    | 12    | 23    | 16    | 3     | 20    | 0     | 15    |
| 0     | 0     | 0     | 4     | 5     | 20    | 0     | 0     | 0     |
| 1,673 | 2,984 | 1,980 | 3,817 | 1,671 | 2,250 | 1,811 | 727   | 1,991 |
| 92    | 13    | 28    | 78    | 35    | 63    | 26    | 0     | 27    |
| 868   | 505   | 726   | 1,275 | 768   | 720   | 839   | 1,778 | 1,052 |
| 0     | 2     | 5     | 12    | 0     | 8     | 0     | 0     | 9     |
| 0     | 0     | 0     | 20    | 0     | 15    | 6     | 0     | 6     |
| 0     | 0     | 6     | 0     | 0     | 3     | 3     | 0     | 2     |
| 0     | 0     | 0     | 4     | 0     | 0     | 0     | 0     | 11    |
| 616   | 475   | 610   | 489   | 486   | 265   | 438   | 598   | 404   |
| 0     | 9     | 24    | 7     | 15    | 16    | 21    | 50    | 8     |
| 21    | 16    | 18    | 9     | 19    | 5     | 5     | 0     | 12    |
| 157   | 73    | 180   | 43    | 105   | 42    | 35    | 161   | 184   |
| 0     | 0     | 2     | 0     | 0     | 0     | 0     | 0     | 0     |
| 0     | 0     | 0     | 7     | 0     | 2     | 4     | 0     | 2     |
| 0     | 28    | 13    | 34    | 0     | 3     | 13    | 0     | 11    |
| 0     | 0     | 0     | 0     | 0     | 0     | 0     | 16    | 5     |
| 0     | 0     | 0     | 5     | 0     | 2     | 0     | 0     | 2     |
| 357   | 763   | 407   | 161   | 441   | 306   | 426   | 236   | 226   |
| 10    | 22    | 17    | 28    | 26    | 0     | 3     | 31    | 26    |
| 16    | 4     | 7     | 20    | 5     | 12    | 3     | 0     | 2     |
| 540   | 178   | 438   | 123   | 320   | 758   | 342   | 947   | 626   |
| 10    | 0     | 5     | 4     | 0     | 2     | 0     | 0     | 3     |
| 0     | 0     | 3     | 0     | 0     | 2     | 0     | 0     | 2     |
| 0     | 0     | 8     | 0     | 0     | 4     | 0     | 0     | 33    |
| 0     | 6     | 0     | 6     | 0     | 9     | 12    | 0     | 8     |
| 0     | 0     | 0     | 0     | 0     | 0     | 0     | 0     | 0     |
| 10    | 11    | 13    | 12    | 6     | 9     | 5     | 0     | 10    |
| 61    | 20    | 65    | 139   | 81    | 82    | 48    | 386   | 144   |
| 0     | 0     | 0     | 7     | 0     | 3     | 0     | 0     | 8     |
| 1,529 | 1,649 | 1,673 | 1,895 | 1,032 | 2,238 | 1,151 | 808   | 1,245 |

|       |       |       |       |       |       |       |       |       |
|-------|-------|-------|-------|-------|-------|-------|-------|-------|
| 31    | 43    | 27    | 39    | 13    | 33    | 16    | 0     | 16    |
| 0     | 34    | 29    | 4     | 11    | 14    | 7     | 0     | 0     |
| 0     | 0     | 0     | 0     | 0     | 2     | 0     | 0     | 0     |
| 0     | 0     | 0     | 0     | 0     | 2     | 0     | 0     | 0     |
| 0     | 3     | 0     | 8     | 0     | 2     | 9     | 16    | 4     |
| 0     | 7     | 5     | 0     | 8     | 7     | 13    | 0     | 3     |
| 1,795 | 1,992 | 1,562 | 2,195 | 2,470 | 1,469 | 2,932 | 2,597 | 2,711 |
| 1,055 | 263   | 567   | 891   | 234   | 1,239 | 121   | 1,284 | 3,133 |
| 0     | 5     | 0     | 9     | 0     | 16    | 0     | 0     | 10    |
| 8     | 6     | 4     | 0     | 0     | 5     | 0     | 0     | 0     |
| 0     | 0     | 0     | 0     | 0     | 0     | 0     | 0     | 0     |
| 0     | 0     | 0     | 0     | 0     | 0     | 0     | 0     | 2     |
| 0     | 0     | 2     | 0     | 0     | 6     | 0     | 0     | 0     |
| 0     | 0     | 0     | 8     | 0     | 0     | 0     | 0     | 1     |
| 0     | 0     | 0     | 2     | 0     | 0     | 0     | 0     | 1     |
| 0     | 3     | 2     | 0     | 0     | 0     | 0     | 0     | 6     |
| 0     | 0     | 0     | 0     | 0     | 4     | 0     | 0     | 0     |
| 0     | 0     | 2     | 5     | 0     | 2     | 0     | 0     | 4     |
| 0     | 3     | 4     | 0     | 5     | 6     | 0     | 0     | 0     |
| 335   | 72    | 128   | 323   | 309   | 386   | 169   | 431   | 495   |
| 0     | 0     | 0     | 6     | 0     | 0     | 0     | 0     | 2     |
| 0     | 0     | 0     | 5     | 0     | 0     | 0     | 0     | 2     |
| 0     | 0     | 0     | 0     | 0     | 2     | 0     | 0     | 3     |
| 0     | 1     | 0     | 0     | 0     | 5     | 0     | 0     | 0     |
| 21    | 3     | 4     | 5     | 8     | 42    | 5     | 0     | 22    |
| 16    | 15    | 17    | 136   | 31    | 15    | 13    | 145   | 149   |
| 410   | 54    | 132   | 203   | 145   | 523   | 118   | 231   | 486   |
| 0     | 25    | 12    | 5     | 5     | 18    | 9     | 0     | 3     |
| 0     | 0     | 0     | 6     | 0     | 0     | 0     | 0     | 3     |
| 0     | 8     | 16    | 8     | 7     | 3     | 21    | 0     | 5     |
| 0     | 8     | 16    | 8     | 7     | 3     | 21    | 0     | 5     |
| 11    | 18    | 17    | 29    | 11    | 25    | 11    | 0     | 2     |
| 0     | 0     | 0     | 0     | 0     | 4     | 0     | 0     | 0     |
| 0     | 0     | 0     | 0     | 0     | 2     | 0     | 0     | 0     |
| 19    | 28    | 51    | 12    | 69    | 30    | 25    | 50    | 97    |
| 0     | 0     | 0     | 4     | 0     | 0     | 0     | 0     | 0     |
| 690   | 1,538 | 725   | 534   | 3,905 | 432   | 2,183 | 7,943 | 1,990 |
| 3,929 | 469   | 476   | 2,073 | 2,058 | 4,982 | 819   | 4,029 | 3,429 |
| 0     | 0     | 0     | 0     | 0     | 2     | 0     | 0     | 0     |
| 24    | 19    | 28    | 109   | 22    | 58    | 20    | 31    | 124   |
| 0     | 0     | 0     | 2     | 0     | 3     | 0     | 0     | 0     |
| 0     | 0     | 3     | 0     | 0     | 3     | 0     | 0     | 0     |
| 0     | 0     | 0     | 0     | 0     | 6     | 0     | 0     | 0     |
| 0     | 3     | 0     | 0     | 0     | 4     | 0     | 0     | 0     |
| 0     | 6     | 6     | 7     | 0     | 2     | 0     | 0     | 2     |
| 0     | 0     | 0     | 9     | 0     | 6     | 0     | 0     | 0     |
| 0     | 3     | 0     | 0     | 0     | 2     | 0     | 0     | 0     |
| 23    | 4     | 17    | 13    | 5     | 26    | 11    | 0     | 10    |
| 34    | 15    | 27    | 153   | 33    | 54    | 14    | 57    | 153   |
| 84    | 10    | 41    | 71    | 80    | 67    | 47    | 98    | 61    |

|       |       |       |       |       |       |       |       |       |
|-------|-------|-------|-------|-------|-------|-------|-------|-------|
| 192   | 208   | 315   | 416   | 313   | 175   | 253   | 255   | 261   |
| 0     | 0     | 0     | 4     | 0     | 0     | 0     | 0     | 0     |
| 0     | 0     | 3     | 0     | 0     | 3     | 0     | 0     | 0     |
| 0     | 0     | 2     | 0     | 0     | 2     | 0     | 0     | 0     |
| 0     | 0     | 2     | 0     | 0     | 0     | 0     | 0     | 0     |
| 0     | 0     | 0     | 4     | 0     | 0     | 0     | 0     | 0     |
| 278   | 397   | 302   | 91    | 219   | 275   | 223   | 192   | 126   |
| 1,029 | 1,062 | 1,141 | 1,172 | 1,394 | 1,447 | 1,692 | 1,127 | 1,179 |
| 1,089 | 1,370 | 1,083 | 2,938 | 1,055 | 1,295 | 1,150 | 814   | 1,354 |
| 0     | 0     | 0     | 35    | 0     | 0     | 0     | 0     | 12    |
| 10    | 2     | 12    | 9     | 0     | 19    | 5     | 0     | 0     |
| 13    | 9     | 6     | 24    | 5     | 20    | 3     | 0     | 28    |
| 2,069 | 3,101 | 2,156 | 7,140 | 4,546 | 685   | 1,515 | 9,373 | 5,307 |
| 0     | 3     | 0     | 23    | 0     | 0     | 0     | 0     | 3     |
| 874   | 472   | 735   | 2,064 | 813   | 495   | 477   | 1,467 | 982   |
| 0     | 0     | 0     | 0     | 6     | 5     | 0     | 0     | 0     |
| 82    | 71    | 52    | 329   | 125   | 43    | 47    | 201   | 215   |
| 16    | 22    | 19    | 44    | 37    | 41    | 19    | 94    | 26    |
| 152   | 77    | 97    | 170   | 115   | 178   | 66    | 94    | 104   |
| 477   | 138   | 151   | 340   | 388   | 334   | 209   | 324   | 297   |
| 0     | 13    | 6     | 0     | 0     | 5     | 11    | 0     | 14    |
| 4     | 1     | 2     | 1     | 0     | 4     | 1     | 0     | 0     |
| 0     | 2     | 3     | 4     | 0     | 6     | 0     | 0     | 2     |
| 0     | 2     | 0     | 0     | 0     | 1     | 2     | 0     | 1     |
| 0     | 0     | 0     | 3     | 0     | 2     | 0     | 0     | 0     |
| 44    | 16    | 16    | 91    | 20    | 76    | 14    | 35    | 44    |
| 2,524 | 2,973 | 2,782 | 1,955 | 2,085 | 3,339 | 1,935 | 2,024 | 1,852 |
| 3,550 | 3,000 | 4,095 | 2,925 | 3,506 | 2,527 | 3,789 | 6,496 | 2,904 |
| 0     | 0     | 4     | 0     | 0     | 7     | 0     | 0     | 0     |
| 16    | 42    | 11    | 67    | 22    | 39    | 27    | 0     | 34    |
| 916   | 481   | 525   | 2,605 | 790   | 840   | 567   | 768   | 1,538 |
| 7     | 0     | 9     | 22    | 3     | 3     | 5     | 31    | 11    |
| 31    | 4     | 27    | 28    | 19    | 16    | 10    | 0     | 7     |
| 39    | 45    | 38    | 18    | 19    | 49    | 36    | 0     | 10    |
| 957   | 1,467 | 978   | 1,396 | 1,039 | 937   | 1,187 | 1,020 | 1,078 |
| 299   | 298   | 201   | 782   | 286   | 223   | 264   | 198   | 489   |
| 32    | 15    | 16    | 36    | 36    | 38    | 14    | 44    | 33    |
| 0     | 3     | 2     | 0     | 0     | 0     | 1     | 0     | 0     |
| 0     | 3     | 2     | 0     | 0     | 0     | 1     | 0     | 0     |
| 0     | 0     | 3     | 12    | 5     | 7     | 0     | 0     | 6     |
| 0     | 0     | 0     | 6     | 0     | 2     | 0     | 0     | 12    |
| 27    | 34    | 37    | 32    | 26    | 30    | 37    | 19    | 56    |
| 0     | 0     | 0     | 0     | 9     | 2     | 0     | 0     | 5     |
| 10    | 11    | 29    | 9     | 0     | 25    | 15    | 0     | 11    |
| 8     | 6     | 27    | 40    | 12    | 34    | 12    | 16    | 41    |
| 8     | 5     | 16    | 12    | 0     | 13    | 0     | 16    | 12    |
| 47    | 199   | 59    | 115   | 180   | 99    | 137   | 31    | 125   |
| 6     | 6     | 2     | 5     | 3     | 11    | 0     | 0     | 1     |
| 8     | 3     | 5     | 21    | 7     | 9     | 0     | 0     | 14    |
| 61    | 4     | 10    | 26    | 13    | 88    | 0     | 0     | 24    |

|         |         |         |        |         |         |         |         |         |
|---------|---------|---------|--------|---------|---------|---------|---------|---------|
| 0       | 3       | 3       | 9      | 0       | 2       | 0       | 0       | 12      |
| 0       | 0       | 2       | 17     | 7       | 6       | 3       | 0       | 0       |
| 7,373   | 9,252   | 9,209   | 2,164  | 7,371   | 8,542   | 12,376  | 4,916   | 3,963   |
| 1,874   | 660     | 836     | 3,878  | 1,434   | 1,233   | 588     | 3,610   | 3,087   |
| 19      | 19      | 13      | 81     | 14      | 24      | 14      | 9       | 34      |
| 0       | 3       | 5       | 16     | 0       | 7       | 3       | 0       | 2       |
| 0       | 3       | 2       | 10     | 0       | 5       | 0       | 0       | 3       |
| 92      | 50      | 67      | 128    | 66      | 80      | 52      | 132     | 92      |
| 186     | 317     | 245     | 495    | 378     | 269     | 585     | 249     | 356     |
| 297,287 | 368,731 | 334,038 | 67,703 | 294,069 | 241,800 | 424,983 | 278,909 | 150,369 |
| 32      | 31      | 40      | 119    | 40      | 89      | 31      | 45      | 74      |
| 8       | 0       | 5       | 12     | 0       | 6       | 0       | 0       | 5       |
| 0       | 0       | 0       | 15     | 0       | 2       | 0       | 0       | 2       |
| 13      | 0       | 4       | 8      | 0       | 6       | 5       | 0       | 2       |
| 11      | 4       | 4       | 46     | 4       | 19      | 6       | 0       | 48      |
| 0       | 0       | 2       | 0      | 0       | 0       | 3       | 0       | 0       |
| 124     | 39      | 42      | 310    | 51      | 117     | 29      | 142     | 200     |
| 1,275   | 3,058   | 1,301   | 1,029  | 5,485   | 475     | 2,795   | 4,797   | 2,775   |
| 0       | 0       | 0       | 11     | 0       | 0       | 3       | 0       | 5       |

| AISO/AIS | NC/NC_1 | NC/NC_2 | NC/NC_3 | NC/NC_4 | NC/NC_5 | Expression level |
|----------|---------|---------|---------|---------|---------|------------------|
| 28       | 0       | 0       | 0       | 0       | 0       | middle           |
| 11       | 0       | 0       | 0       | 0       | 3       | middle           |
| 511      | 43      | 19      | 40      | 45      | 20      | middle           |
| 2,738    | 6,220   | 3,777   | 4,179   | 3,975   | 4,501   | high             |
| 10       | 0       | 0       | 0       | 9       | 3       | middle           |
| 11       | 0       | 4       | 0       | 4       | 6       | middle           |
| 28       | 8       | 11      | 4       | 17      | 13      | middle           |
| 4        | 0       | 0       | 0       | 0       | 0       | middle           |
| 372      | 242     | 239     | 373     | 293     | 180     | middle           |
| 548      | 430     | 395     | 503     | 287     | 226     | middle           |
| 31       | 0       | 0       | 0       | 0       | 3       | middle           |
| 41       | 68      | 54      | 68      | 44      | 97      | middle           |
| 51       | 59      | 105     | 106     | 68      | 64      | middle           |
| 2        | 0       | 0       | 0       | 0       | 0       | low              |
| 355      | 1,222   | 931     | 1,633   | 440     | 601     | middle           |
| 10       | 0       | 0       | 0       | 0       | 0       | middle           |
| 23       | 0       | 18      | 0       | 0       | 10      | middle           |
| 381      | 644     | 551     | 308     | 328     | 510     | middle           |
| 8        | 235     | 139     | 186     | 26      | 26      | middle           |
| 266      | 674     | 373     | 553     | 436     | 256     | middle           |
| 6        | 0       | 0       | 0       | 0       | 0       | low              |
| 48       | 0       | 25      | 0       | 7       | 62      | middle           |
| 2,735    | 4,454   | 3,584   | 3,850   | 4,286   | 4,411   | high             |
| 10       | 0       | 7       | 0       | 0       | 6       | middle           |
| 136      | 299     | 186     | 205     | 189     | 275     | middle           |
| 17,641   | 34,696  | 19,275  | 32,588  | 39,322  | 22,389  | high             |
| 89       | 27      | 33      | 0       | 36      | 25      | middle           |
| 1,253    | 902     | 717     | 683     | 678     | 621     | middle           |
| 41       | 63      | 56      | 37      | 32      | 48      | middle           |
| 4        | 186     | 79      | 137     | 17      | 174     | middle           |
| 6        | 0       | 0       | 0       | 0       | 0       | middle           |
| 362      | 226     | 200     | 124     | 243     | 149     | middle           |
| 4,079    | 4,871   | 4,696   | 3,682   | 3,964   | 8,149   | high             |
| 3        | 0       | 0       | 0       | 0       | 0       | low              |
| 6        | 0       | 0       | 0       | 0       | 0       | middle           |
| 5,260    | 3,626   | 3,290   | 3,099   | 3,850   | 2,599   | high             |
| 1,791    | 1,236   | 1,589   | 714     | 906     | 1,308   | high             |
| 174      | 129     | 286     | 211     | 105     | 280     | middle           |
| 2        | 0       | 0       | 0       | 0       | 0       | low              |
| 5        | 0       | 0       | 0       | 0       | 0       | middle           |
| 560      | 1,231   | 1,573   | 615     | 530     | 1,303   | middle           |
| 8        | 0       | 0       | 0       | 0       | 0       | middle           |
| 1,270    | 1,344   | 1,040   | 1,403   | 2,206   | 1,097   | high             |
| 4        | 0       | 0       | 0       | 0       | 4       | middle           |
| 8        | 0       | 0       | 0       | 0       | 0       | middle           |
| 1,832    | 2,557   | 1,889   | 2,232   | 3,080   | 1,225   | high             |
| 1,832    | 2,557   | 1,889   | 2,232   | 3,080   | 1,225   | high             |

|       |       |       |       |       |       |        |
|-------|-------|-------|-------|-------|-------|--------|
| 477   | 158   | 192   | 230   | 475   | 186   | middle |
| 4     | 0     | 0     | 0     | 9     | 0     | middle |
| 23    | 0     | 12    | 0     | 0     | 17    | middle |
| 2,601 | 3,255 | 2,174 | 3,608 | 4,704 | 1,841 | high   |
| 13    | 63    | 44    | 0     | 12    | 45    | middle |
| 78    | 0     | 25    | 0     | 57    | 40    | middle |
| 4     | 163   | 83    | 106   | 7     | 0     | middle |
| 0     | 0     | 0     | 0     | 0     | 0     | middle |
| 52    | 54    | 28    | 0     | 55    | 31    | middle |
| 2     | 0     | 0     | 0     | 0     | 0     | low    |
| 1,007 | 398   | 385   | 478   | 925   | 801   | high   |
| 83    | 177   | 227   | 211   | 34    | 368   | middle |
| 2     | 0     | 0     | 0     | 0     | 0     | low    |
| 1,252 | 1,492 | 1,382 | 1,307 | 1,699 | 1,139 | middle |
| 4     | 0     | 0     | 0     | 0     | 0     | low    |
| 38    | 23    | 11    | 16    | 19    | 15    | middle |
| 2,876 | 9,388 | 6,227 | 4,080 | 2,813 | 5,689 | high   |
| 211   | 93    | 165   | 96    | 73    | 94    | middle |
| 4,443 | 2,725 | 5,174 | 3,602 | 3,830 | 3,004 | high   |
| 4     | 0     | 0     | 0     | 0     | 8     | middle |
| 4     | 0     | 0     | 0     | 0     | 0     | middle |
| 0     | 0     | 0     | 0     | 0     | 0     | low    |
| 1,568 | 2,118 | 2,729 | 1,894 | 901   | 4,038 | high   |
| 1,830 | 1,814 | 1,436 | 1,976 | 2,206 | 1,343 | high   |
| 10    | 29    | 12    | 0     | 12    | 14    | middle |
| 3,118 | 3,793 | 2,663 | 3,217 | 3,279 | 2,617 | high   |
| 2     | 0     | 0     | 0     | 0     | 3     | middle |
| 82    | 0     | 86    | 0     | 52    | 62    | middle |
| 15    | 0     | 0     | 0     | 0     | 7     | middle |
| 2,538 | 2,254 | 2,188 | 2,062 | 2,444 | 2,098 | high   |
| 4     | 0     | 0     | 0     | 0     | 0     | low    |
| 0     | 0     | 0     | 0     | 0     | 0     | low    |
| 50    | 217   | 91    | 186   | 105   | 68    | middle |
| 88    | 32    | 44    | 0     | 63    | 55    | middle |
| 6     | 0     | 0     | 0     | 15    | 11    | middle |
| 4     | 0     | 0     | 0     | 0     | 6     | middle |
| 2     | 0     | 0     | 0     | 0     | 0     | middle |
| 0     | 0     | 0     | 0     | 0     | 3     | middle |
| 2     | 0     | 0     | 0     | 0     | 0     | middle |
| 56    | 86    | 74    | 124   | 15    | 64    | middle |
| 87    | 0     | 0     | 0     | 106   | 46    | middle |
| 13    | 0     | 0     | 0     | 0     | 0     | middle |
| 253   | 113   | 165   | 149   | 337   | 517   | middle |
| 424   | 652   | 483   | 391   | 385   | 450   | middle |
| 33    | 167   | 39    | 621   | 12    | 119   | middle |
| 4,515 | 5,708 | 5,622 | 5,154 | 5,985 | 5,905 | high   |
| 60    | 77    | 65    | 50    | 63    | 100   | middle |
| 0     | 0     | 0     | 0     | 0     | 0     | middle |
| 1,862 | 2,204 | 2,049 | 1,049 | 1,476 | 1,562 | high   |
| 1,247 | 1,516 | 1,593 | 1,580 | 640   | 2,589 | high   |



|        |        |       |        |       |        |        |
|--------|--------|-------|--------|-------|--------|--------|
| 376    | 279    | 295   | 292    | 114   | 293    | middle |
| 320    | 199    | 275   | 261    | 251   | 284    | middle |
| 18     | 0      | 0     | 16     | 24    | 5      | middle |
| 38     | 0      | 28    | 0      | 86    | 20     | middle |
| 310    | 1,276  | 408   | 453    | 232   | 651    | middle |
| 14     | 0      | 0     | 0      | 15    | 0      | middle |
| 6      | 0      | 0     | 0      | 10    | 17     | middle |
| 1,299  | 1,279  | 968   | 1,217  | 831   | 690    | high   |
| 16     | 32     | 32    | 0      | 0     | 45     | middle |
| 0      | 0      | 0     | 0      | 0     | 4      | middle |
| 124    | 201    | 134   | 134    | 136   | 159    | middle |
| 2,662  | 4,691  | 2,979 | 3,471  | 5,743 | 2,298  | high   |
| 229    | 249    | 213   | 155    | 305   | 237    | middle |
| 1,099  | 1,041  | 1,251 | 758    | 1,182 | 1,029  | high   |
| 22     | 23     | 74    | 0      | 9     | 144    | middle |
| 10     | 0      | 0     | 0      | 0     | 12     | middle |
| 43     | 258    | 62    | 720    | 23    | 39     | middle |
| 21,051 | 4,830  | 7,728 | 4,601  | 9,718 | 7,097  | high   |
| 12     | 0      | 11    | 0      | 0     | 32     | middle |
| 717    | 693    | 571   | 553    | 727   | 690    | middle |
| 3      | 0      | 0     | 0      | 4     | 2      | low    |
| 106    | 127    | 576   | 528    | 67    | 708    | middle |
| 26     | 0      | 22    | 0      | 34    | 43     | middle |
| 13     | 32     | 14    | 0      | 15    | 18     | middle |
| 334    | 435    | 297   | 261    | 396   | 379    | middle |
| 48     | 0      | 51    | 0      | 34    | 43     | middle |
| 8      | 0      | 0     | 0      | 0     | 0      | middle |
| 9,198  | 13,186 | 9,979 | 19,877 | 6,278 | 11,503 | high   |
| 239    | 122    | 84    | 106    | 233   | 122    | middle |
| 0      | 0      | 9     | 75     | 0     | 6      | middle |
| 324    | 290    | 431   | 298    | 310   | 698    | middle |
| 3      | 23     | 0     | 0      | 0     | 10     | middle |
| 14     | 32     | 0     | 56     | 70    | 9      | middle |
| 14     | 0      | 0     | 0      | 0     | 7      | middle |
| 2      | 0      | 0     | 0      | 0     | 0      | low    |
| 4      | 0      | 0     | 0      | 0     | 6      | middle |
| 291    | 321    | 521   | 233    | 270   | 755    | middle |
| 16     | 0      | 0     | 0      | 0     | 21     | middle |
| 8      | 0      | 9     | 0      | 23    | 3      | middle |
| 0      | 0      | 0     | 0      | 0     | 0      | low    |
| 317    | 1,575  | 318   | 1,360  | 262   | 418    | high   |
| 2      | 0      | 0     | 0      | 0     | 0      | low    |
| 0      | 0      | 0     | 0      | 0     | 0      | low    |
| 53     | 23     | 12    | 37     | 19    | 26     | middle |
| 4      | 0      | 11    | 0      | 9     | 12     | middle |
| 156    | 113    | 139   | 168    | 198   | 413    | middle |
| 17     | 23     | 25    | 0      | 34    | 6      | middle |
| 112    | 95     | 72    | 62     | 86    | 97     | middle |
| 71     | 285    | 46    | 1,602  | 16    | 83     | middle |
| 24     | 36     | 26    | 0      | 0     | 45     | middle |

|       |       |       |       |       |       |        |
|-------|-------|-------|-------|-------|-------|--------|
| 19    | 0     | 11    | 0     | 0     | 3     | middle |
| 72    | 104   | 33    | 0     | 54    | 57    | middle |
| 16    | 0     | 0     | 0     | 0     | 35    | middle |
| 0     | 724   | 0     | 99    | 0     | 12    | middle |
| 0     | 0     | 0     | 0     | 0     | 0     | low    |
| 2,274 | 1,874 | 1,452 | 1,894 | 2,117 | 1,256 | high   |
| 127   | 263   | 107   | 1,739 | 15    | 70    | middle |
| 56    | 32    | 72    | 0     | 58    | 76    | middle |
| 91    | 199   | 142   | 534   | 229   | 261   | middle |
| 19    | 23    | 39    | 0     | 0     | 60    | middle |
| 8     | 0     | 0     | 0     | 0     | 0     | middle |
| 14    | 0     | 0     | 0     | 0     | 21    | middle |
| 25    | 45    | 56    | 655   | 10    | 82    | middle |
| 2     | 0     | 0     | 0     | 0     | 4     | low    |
| 453   | 444   | 658   | 758   | 332   | 1,397 | middle |
| 161   | 100   | 158   | 68    | 159   | 152   | middle |
| 11    | 27    | 12    | 279   | 0     | 15    | middle |
| 4     | 0     | 12    | 50    | 0     | 0     | middle |
| 6     | 0     | 0     | 0     | 0     | 0     | middle |
| 8     | 0     | 0     | 0     | 31    | 12    | middle |
| 4     | 0     | 11    | 0     | 7     | 38    | middle |
| 2,202 | 2,616 | 1,666 | 2,018 | 1,824 | 2,123 | high   |
| 55    | 50    | 84    | 43    | 12    | 213   | middle |
| 1,189 | 751   | 889   | 1,757 | 739   | 1,934 | middle |
| 6     | 0     | 0     | 0     | 0     | 6     | middle |
| 3     | 0     | 0     | 0     | 0     | 3     | middle |
| 6     | 0     | 21    | 0     | 0     | 10    | middle |
| 2     | 0     | 0     | 0     | 0     | 0     | middle |
| 492   | 471   | 408   | 379   | 691   | 512   | middle |
| 16    | 0     | 17    | 0     | 0     | 38    | middle |
| 13    | 0     | 21    | 0     | 9     | 44    | middle |
| 119   | 102   | 96    | 1,108 | 61    | 183   | middle |
| 0     | 45    | 0     | 0     | 0     | 0     | middle |
| 0     | 0     | 0     | 0     | 0     | 0     | low    |
| 12    | 0     | 9     | 0     | 10    | 15    | middle |
| 0     | 0     | 0     | 0     | 0     | 10    | middle |
| 2     | 0     | 0     | 0     | 0     | 0     | low    |
| 326   | 406   | 365   | 302   | 669   | 337   | middle |
| 19    | 36    | 21    | 0     | 70    | 24    | middle |
| 8     | 0     | 19    | 0     | 7     | 6     | middle |
| 368   | 407   | 415   | 3,921 | 194   | 492   | high   |
| 3     | 0     | 11    | 0     | 0     | 21    | middle |
| 3     | 0     | 0     | 0     | 0     | 3     | low    |
| 2     | 0     | 0     | 0     | 0     | 8     | middle |
| 3     | 0     | 0     | 0     | 7     | 12    | middle |
| 2     | 0     | 0     | 0     | 0     | 13    | middle |
| 12    | 0     | 26    | 0     | 16    | 26    | middle |
| 94    | 138   | 120   | 267   | 34    | 55    | middle |
| 0     | 0     | 0     | 0     | 0     | 0     | low    |
| 1,298 | 1,572 | 1,326 | 1,414 | 981   | 956   | high   |

|       |       |       |       |       |        |        |
|-------|-------|-------|-------|-------|--------|--------|
| 32    | 0     | 32    | 0     | 20    | 47     | middle |
| 14    | 0     | 12    | 0     | 13    | 22     | middle |
| 0     | 0     | 0     | 0     | 0     | 8      | low    |
| 0     | 0     | 0     | 0     | 0     | 8      | low    |
| 2     | 0     | 0     | 0     | 0     | 16     | middle |
| 3     | 0     | 0     | 0     | 4     | 6      | middle |
| 1,801 | 1,276 | 1,301 | 1,546 | 2,954 | 2,200  | high   |
| 561   | 1,064 | 1,121 | 3,875 | 319   | 440    | high   |
| 3     | 0     | 0     | 0     | 0     | 10     | middle |
| 2     | 0     | 0     | 0     | 0     | 8      | low    |
| 2     | 0     | 0     | 0     | 0     | 5      | low    |
| 0     | 0     | 0     | 0     | 7     | 0      | low    |
| 0     | 0     | 0     | 0     | 0     | 0      | low    |
| 2     | 0     | 0     | 0     | 0     | 0      | low    |
| 1     | 0     | 0     | 0     | 0     | 0      | low    |
| 0     | 0     | 0     | 0     | 0     | 0      | low    |
| 0     | 0     | 0     | 0     | 0     | 10     | low    |
| 3     | 27    | 0     | 0     | 0     | 3      | middle |
| 0     | 0     | 0     | 0     | 0     | 4      | low    |
| 175   | 267   | 292   | 491   | 160   | 208    | middle |
| 2     | 0     | 0     | 0     | 0     | 0      | low    |
| 0     | 0     | 0     | 0     | 0     | 0      | low    |
| 0     | 0     | 0     | 0     | 0     | 6      | low    |
| 2     | 0     | 0     | 0     | 0     | 20     | middle |
| 13    | 0     | 12    | 0     | 0     | 29     | middle |
| 55    | 50    | 44    | 81    | 19    | 32     | middle |
| 188   | 186   | 318   | 236   | 73    | 767    | middle |
| 6     | 0     | 0     | 0     | 10    | 10     | middle |
| 0     | 0     | 0     | 0     | 0     | 0      | low    |
| 10    | 0     | 0     | 0     | 5     | 14     | middle |
| 10    | 0     | 0     | 0     | 5     | 14     | middle |
| 18    | 23    | 9     | 0     | 9     | 23     | middle |
| 0     | 0     | 0     | 0     | 0     | 7      | low    |
| 0     | 0     | 0     | 0     | 0     | 4      | low    |
| 36    | 33    | 4     | 48    | 53    | 19     | middle |
| 2     | 0     | 0     | 0     | 0     | 0      | low    |
| 527   | 625   | 308   | 528   | 4,399 | 371    | high   |
| 2,253 | 684   | 3,163 | 702   | 1,928 | 14,168 | high   |
| 0     | 0     | 0     | 0     | 0     | 3      | low    |
| 45    | 23    | 44    | 0     | 23    | 72     | middle |
| 0     | 0     | 0     | 0     | 0     | 0      | low    |
| 2     | 0     | 0     | 0     | 0     | 15     | middle |
| 0     | 0     | 0     | 0     | 0     | 4      | low    |
| 0     | 0     | 0     | 0     | 0     | 0      | low    |
| 6     | 0     | 9     | 0     | 0     | 0      | low    |
| 0     | 0     | 0     | 0     | 0     | 0      | low    |
| 0     | 0     | 0     | 0     | 0     | 0      | low    |
| 21    | 12    | 8     | 10    | 5     | 97     | middle |
| 76    | 0     | 42    | 37    | 20    | 97     | middle |
| 103   | 50    | 77    | 43    | 41    | 106    | middle |

|       |       |       |       |       |       |        |
|-------|-------|-------|-------|-------|-------|--------|
| 298   | 222   | 223   | 391   | 173   | 213   | middle |
| 0     | 0     | 0     | 0     | 0     | 4     | low    |
| 0     | 0     | 0     | 0     | 0     | 0     | low    |
| 0     | 0     | 0     | 0     | 0     | 0     | low    |
| 2     | 0     | 0     | 0     | 0     | 0     | low    |
| 0     | 0     | 0     | 0     | 0     | 4     | low    |
| 236   | 217   | 199   | 137   | 287   | 257   | middle |
| 1,028 | 828   | 949   | 807   | 1,317 | 1,728 | middle |
| 1,332 | 1,428 | 1,350 | 1,788 | 1,117 | 963   | high   |
| 5     | 0     | 0     | 0     | 0     | 6     | middle |
| 13    | 0     | 21    | 0     | 0     | 48    | middle |
| 15    | 0     | 9     | 0     | 0     | 27    | middle |
| 2,981 | 2,485 | 2,670 | 2,397 | 4,273 | 1,530 | high   |
| 6     | 0     | 0     | 0     | 0     | 10    | middle |
| 983   | 1,747 | 1,107 | 869   | 657   | 1,395 | middle |
| 0     | 0     | 0     | 0     | 0     | 17    | middle |
| 110   | 77    | 72    | 50    | 181   | 54    | middle |
| 24    | 68    | 37    | 0     | 28    | 26    | middle |
| 145   | 50    | 137   | 0     | 67    | 210   | middle |
| 271   | 163   | 281   | 273   | 246   | 997   | middle |
| 5     | 0     | 0     | 0     | 16    | 7     | middle |
| 1     | 0     | 0     | 0     | 0     | 16    | middle |
| 0     | 0     | 0     | 0     | 0     | 4     | low    |
| 1     | 0     | 0     | 0     | 6     | 0     | low    |
| 1     | 0     | 0     | 0     | 0     | 8     | low    |
| 29    | 0     | 74    | 93    | 29    | 61    | middle |
| 1,912 | 3,160 | 1,953 | 2,099 | 2,257 | 2,119 | high   |
| 2,860 | 2,515 | 2,886 | 2,339 | 4,018 | 4,195 | high   |
| 0     | 0     | 0     | 0     | 0     | 13    | middle |
| 22    | 27    | 26    | 50    | 26    | 26    | middle |
| 1,001 | 659   | 886   | 845   | 804   | 860   | high   |
| 6     | 0     | 4     | 19    | 4     | 9     | middle |
| 41    | 36    | 35    | 0     | 0     | 24    | middle |
| 25    | 34    | 50    | 0     | 19    | 34    | middle |
| 868   | 810   | 866   | 565   | 1,511 | 1,961 | middle |
| 441   | 204   | 413   | 286   | 310   | 874   | middle |
| 26    | 11    | 31    | 19    | 22    | 48    | middle |
| 1     | 0     | 0     | 0     | 0     | 4     | low    |
| 1     | 0     | 0     | 0     | 0     | 4     | low    |
| 4     | 0     | 0     | 0     | 19    | 9     | middle |
| 0     | 0     | 9     | 0     | 0     | 0     | middle |
| 39    | 59    | 21    | 43    | 25    | 16    | middle |
| 2     | 0     | 0     | 0     | 0     | 4     | low    |
| 10    | 0     | 23    | 0     | 9     | 12    | middle |
| 23    | 0     | 33    | 0     | 7     | 57    | middle |
| 16    | 0     | 19    | 0     | 0     | 23    | middle |
| 83    | 59    | 39    | 99    | 255   | 39    | middle |
| 6     | 0     | 9     | 0     | 0     | 5     | middle |
| 15    | 0     | 0     | 0     | 0     | 27    | middle |
| 21    | 32    | 21    | 31    | 16    | 63    | middle |

|         |         |         |         |         |         |        |
|---------|---------|---------|---------|---------|---------|--------|
| 5       | 0       | 11      | 0       | 0       | 0       | middle |
| 7       | 0       | 9       | 0       | 0       | 10      | middle |
| 4,483   | 6,260   | 5,069   | 6,073   | 8,351   | 5,115   | high   |
| 1,830   | 1,718   | 1,873   | 1,726   | 1,814   | 3,051   | high   |
| 34      | 23      | 30      | 16      | 17      | 61      | middle |
| 6       | 0       | 11      | 0       | 0       | 5       | middle |
| 6       | 0       | 11      | 0       | 0       | 9       | middle |
| 100     | 77      | 81      | 37      | 41      | 174     | middle |
| 263     | 258     | 195     | 435     | 449     | 206     | middle |
| 188,400 | 404,481 | 239,300 | 196,071 | 428,172 | 172,667 | high   |
| 38      | 50      | 84      | 62      | 28      | 13      | middle |
| 9       | 0       | 11      | 0       | 7       | 6       | middle |
| 7       | 0       | 11      | 0       | 7       | 0       | middle |
| 7       | 0       | 0       | 0       | 0       | 24      | middle |
| 8       | 0       | 12      | 16      | 7       | 32      | middle |
| 0       | 0       | 0       | 0       | 0       | 3       | low    |
| 88      | 38      | 146     | 149     | 85      | 184     | middle |
| 967     | 1,215   | 603     | 941     | 7,874   | 657     | high   |
| 3       | 0       | 0       | 0       | 12      | 0       | middle |
