# Supplementary material for: Dysregulated Bone Metabolism Is Related to High Expression of miR-151a-3p in Severe Adolescent Idiopathic Scoliosis
Source: Biomed Res Int. 2020 Sep 26;2020:4243015. doi: 10.1155/2020/4243015 (PMC7537684; doi:10.1155/2020/4243015)
Supplement: Supplementary Materials — Supplemental table S1: candidate miRNA expression profile by miRNA sequencing. Supplemental table S2: summary of the primer sequences for RT-PCR. Supplemental table S3: predicted target gene of miR-151a-30 by TargetScan7.2. Supplemental table S4: predicted target gene of miR-151a-30 by miRDB. Supplemental table S5: primer sequences for methylation-specific PCR (MSP). [file 4243015.f1.zip]

Archive with 4 entries (4 files):
- Supplementary table 1_candidate miRNAs expression.pdf
- Supplementary Table 2, 5.pdf
- Supplementary table 3_TargetScan7.2.pdf
- Supplementray table 4_miRDB_pre_targets_miR-151a-3p.pdf
